# Supplementary material
Source: PubMed Central journal article supplement (PMC2098817)

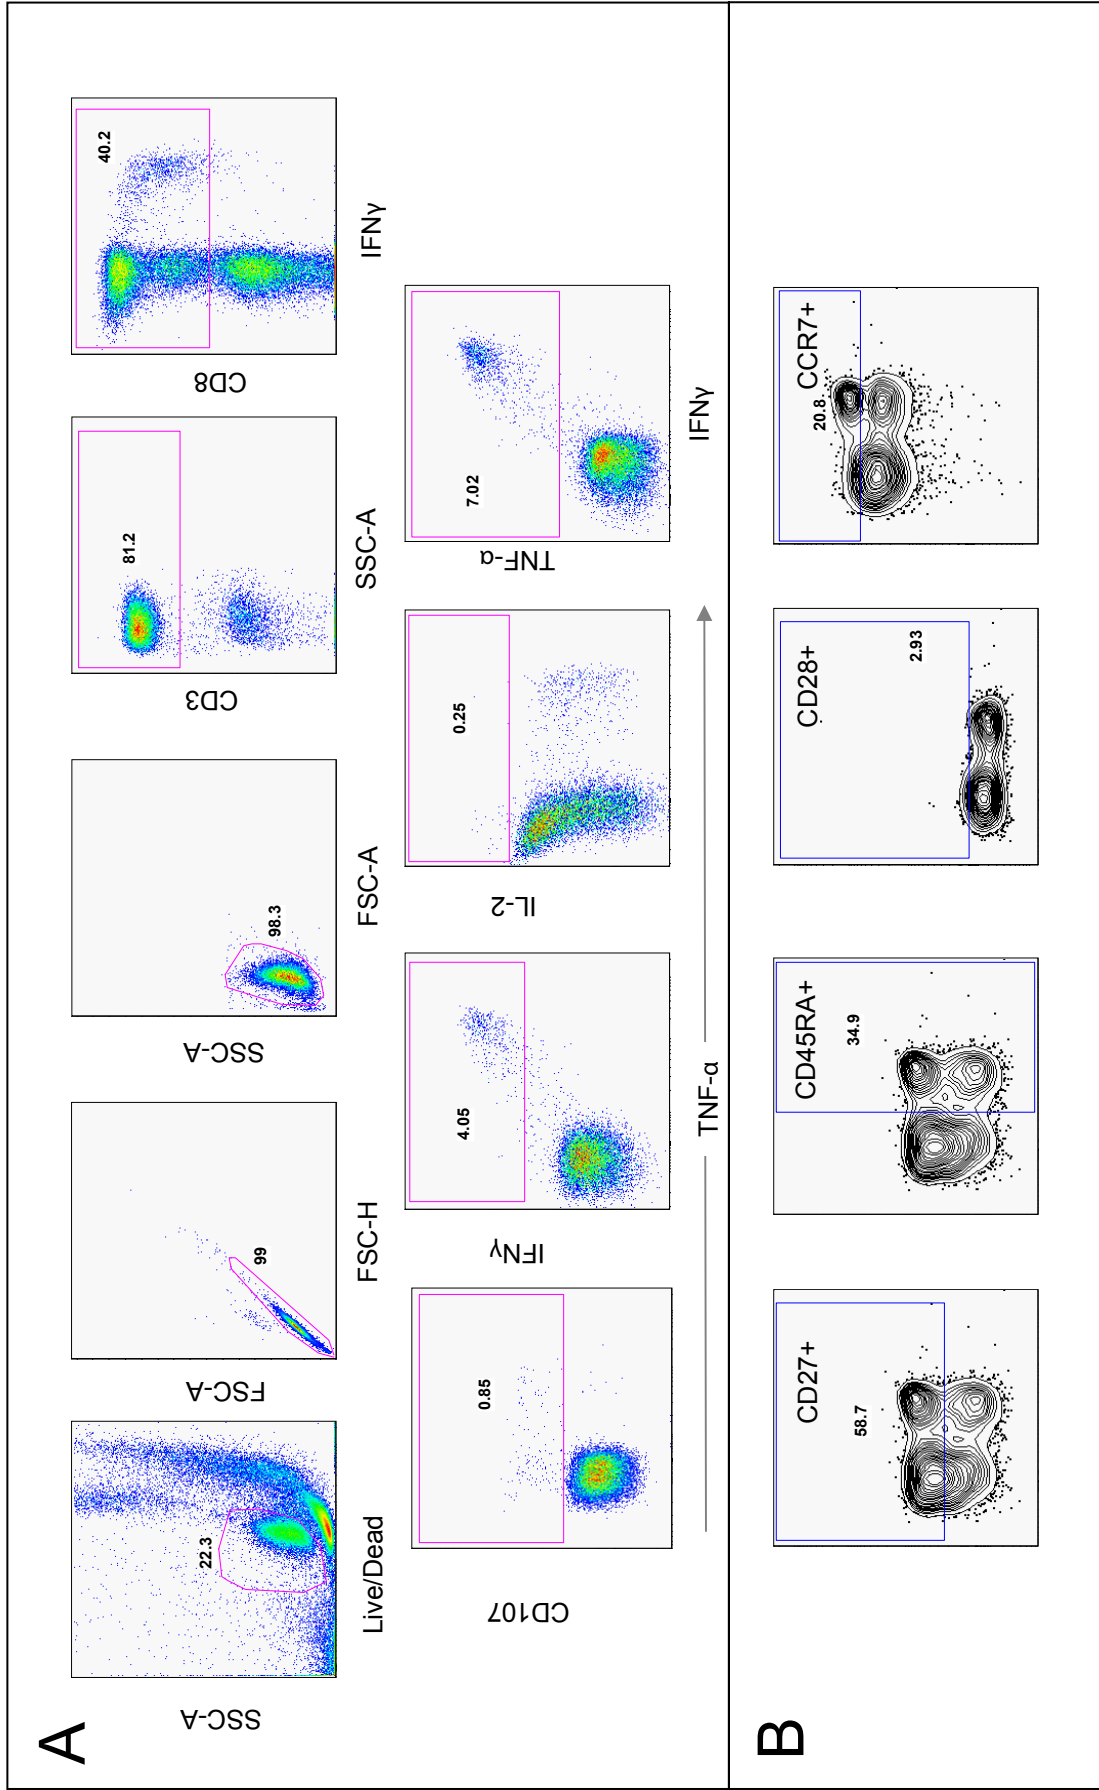

Supplement: ppat.0030165.sg001.pdf [file ppat.0030165.sg001.pdf]

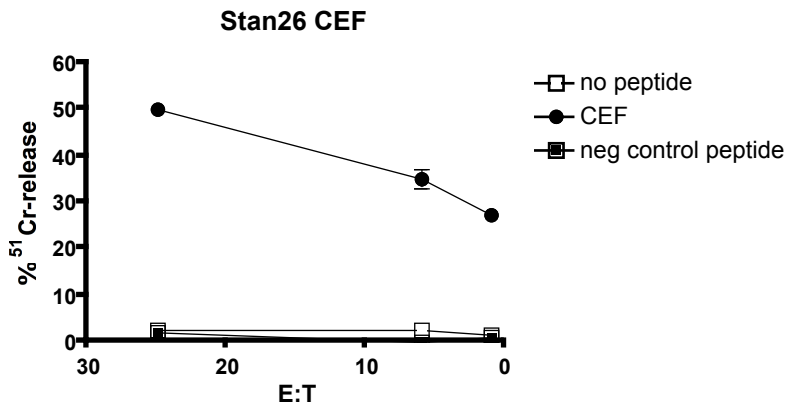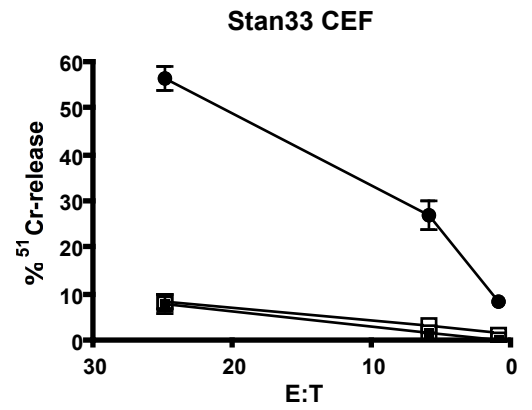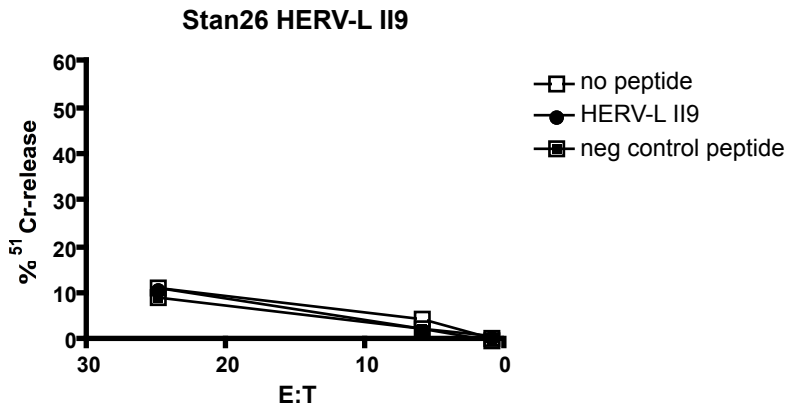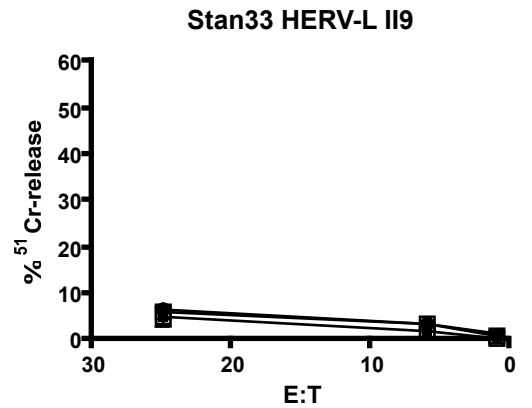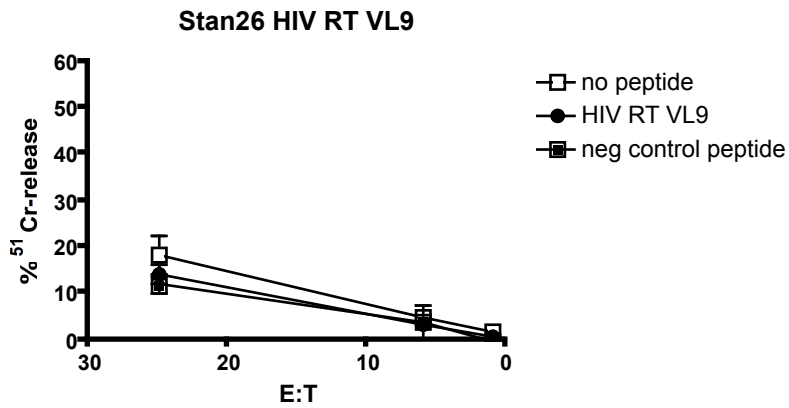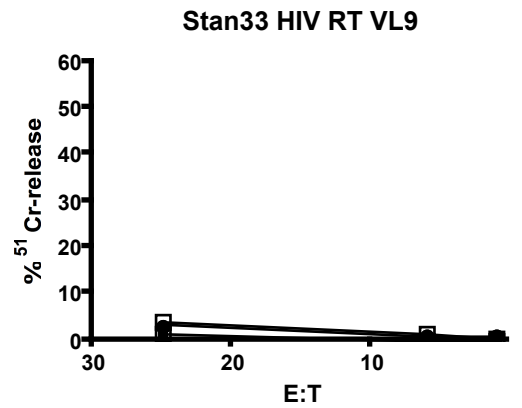

Supplement: ppat.0030165.sg002.pdf [file ppat.0030165.sg002.pdf]

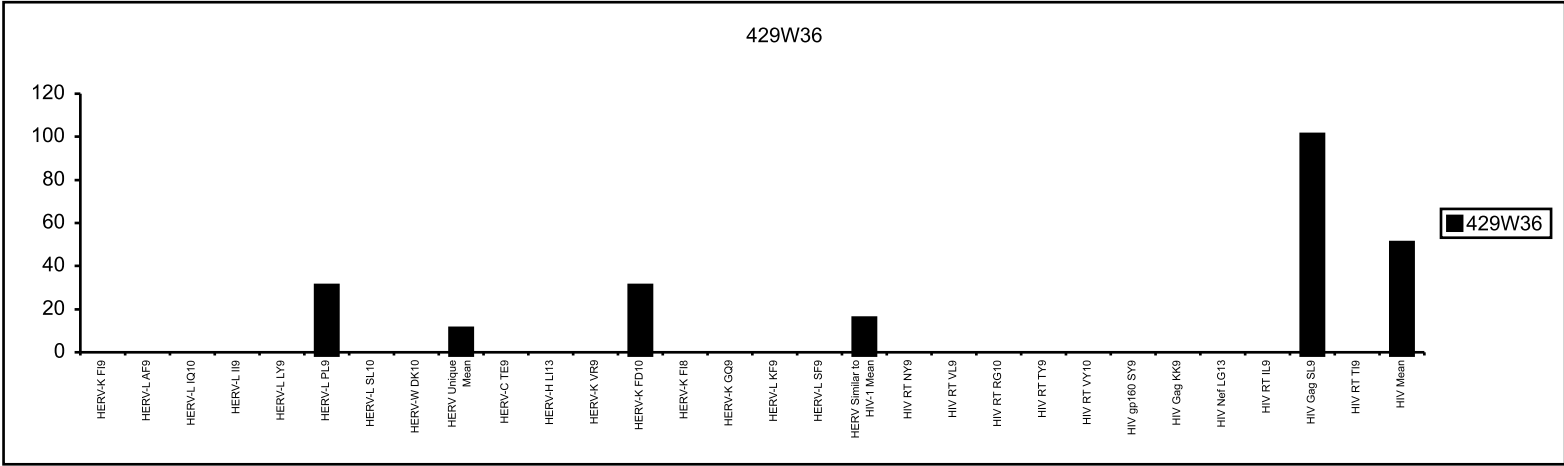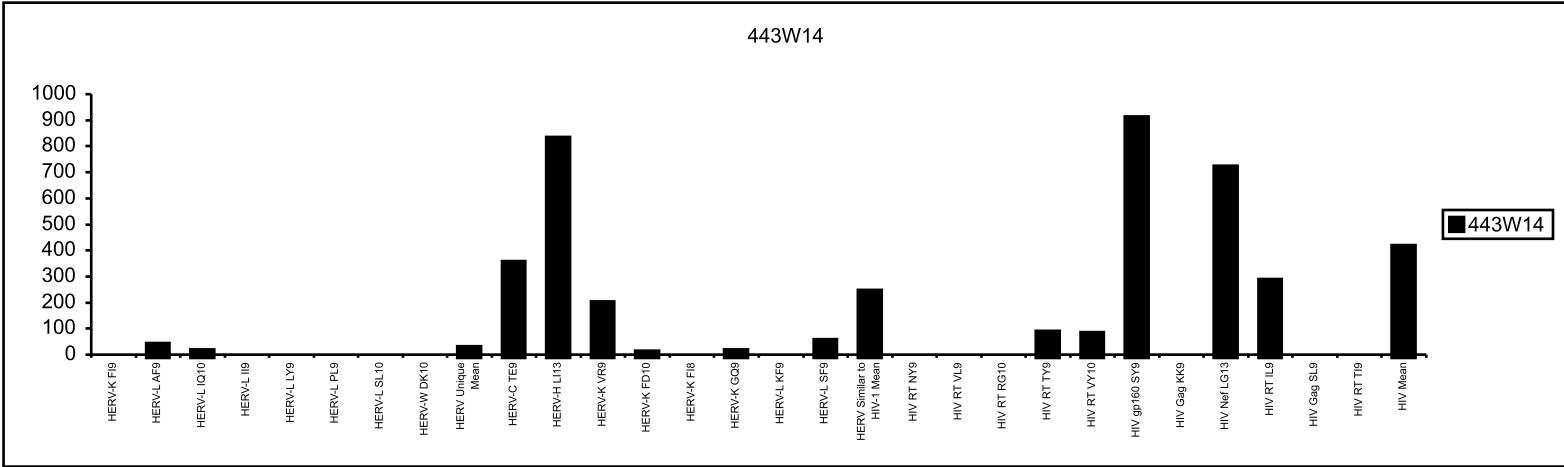

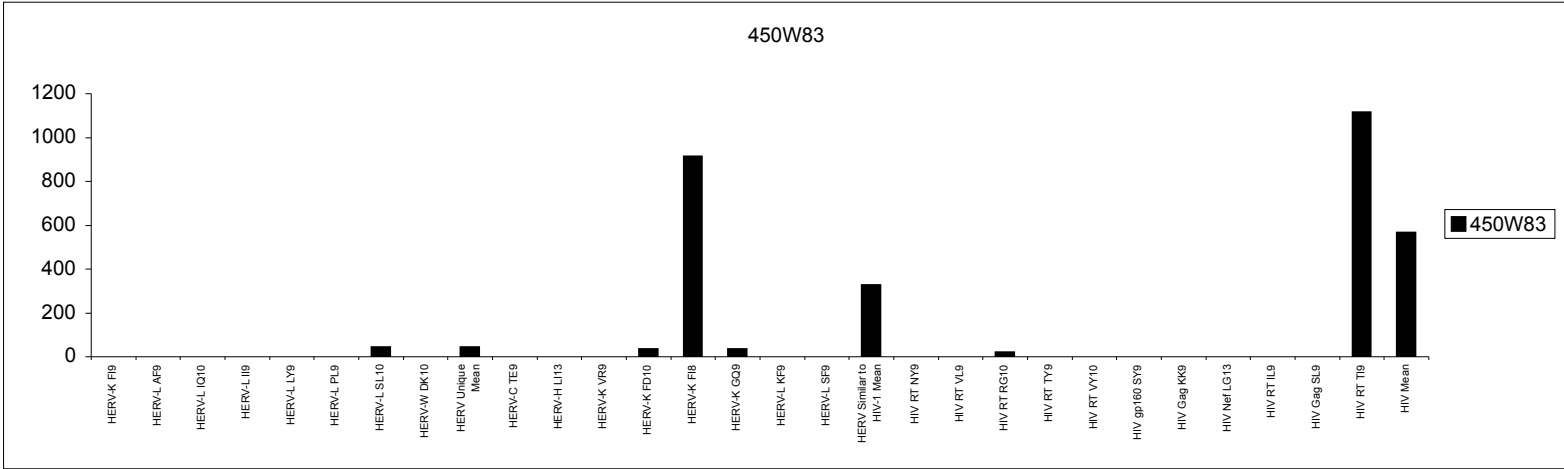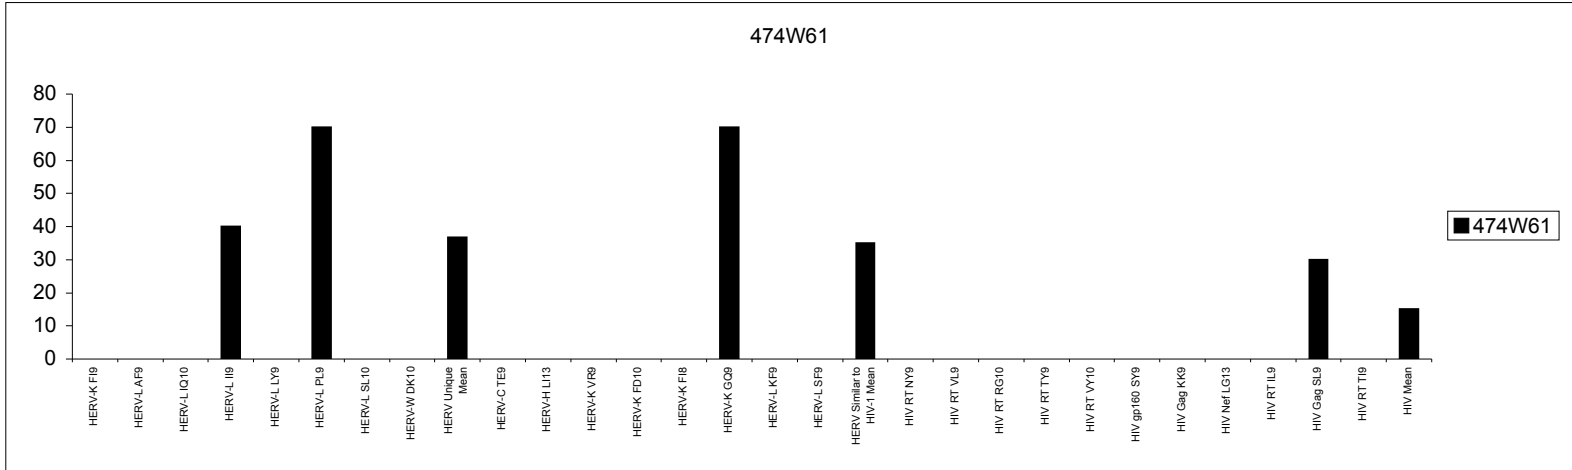

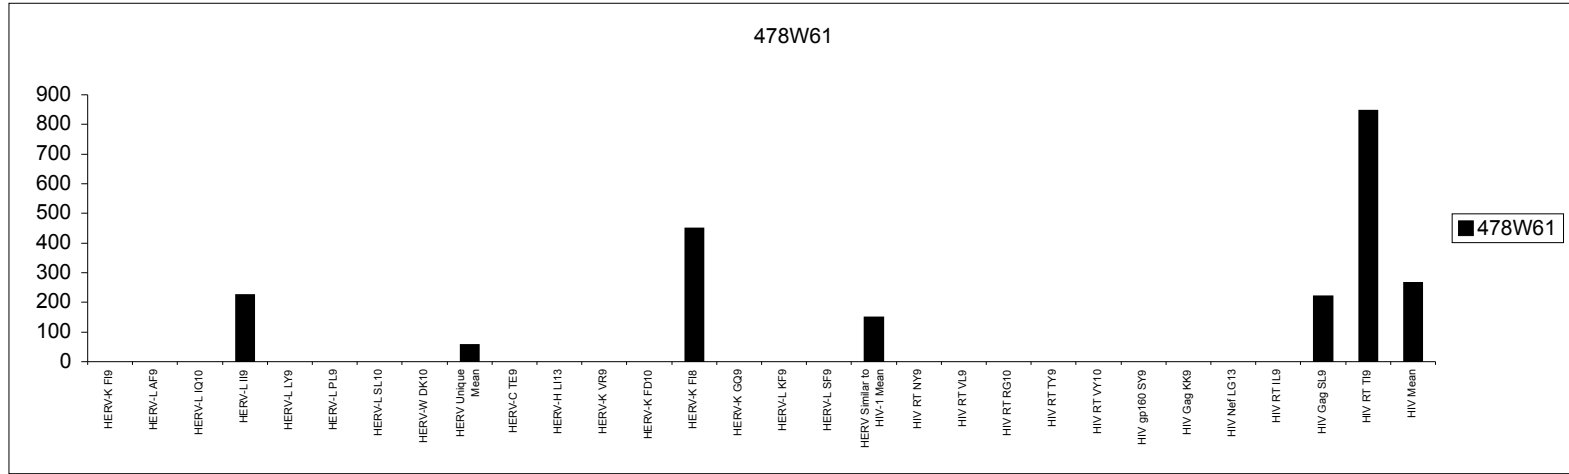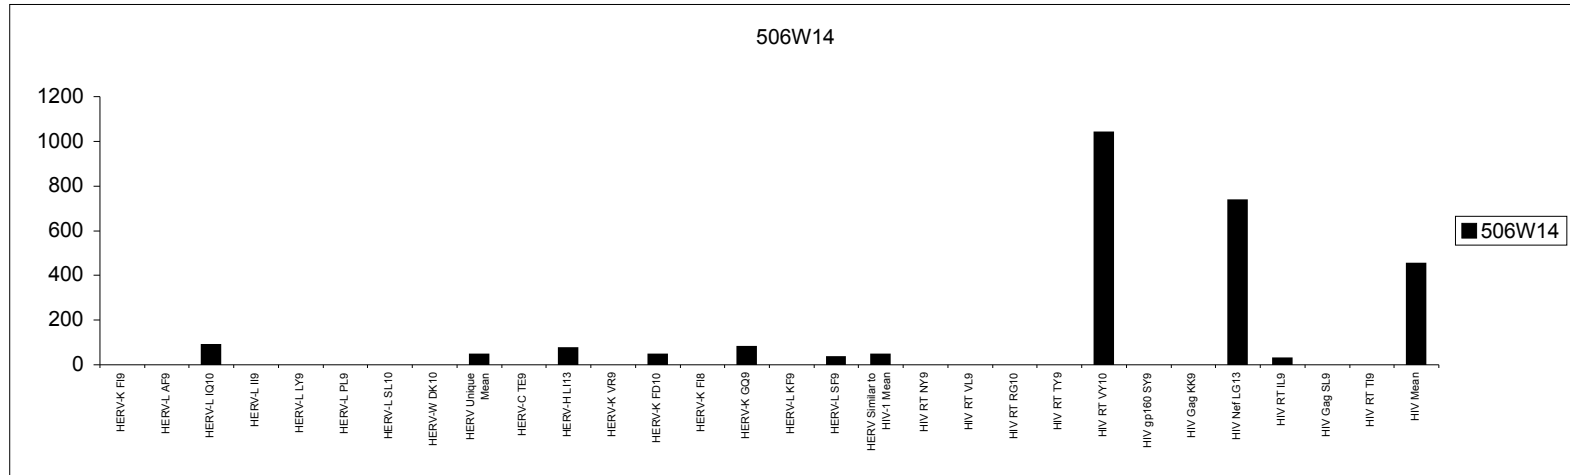

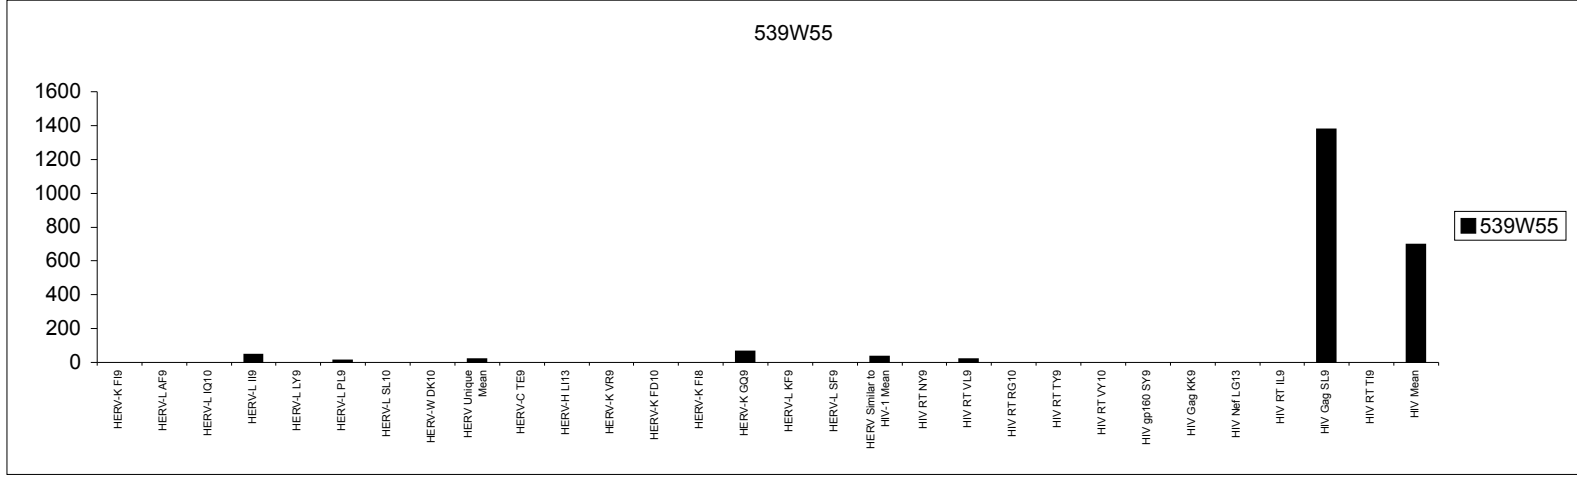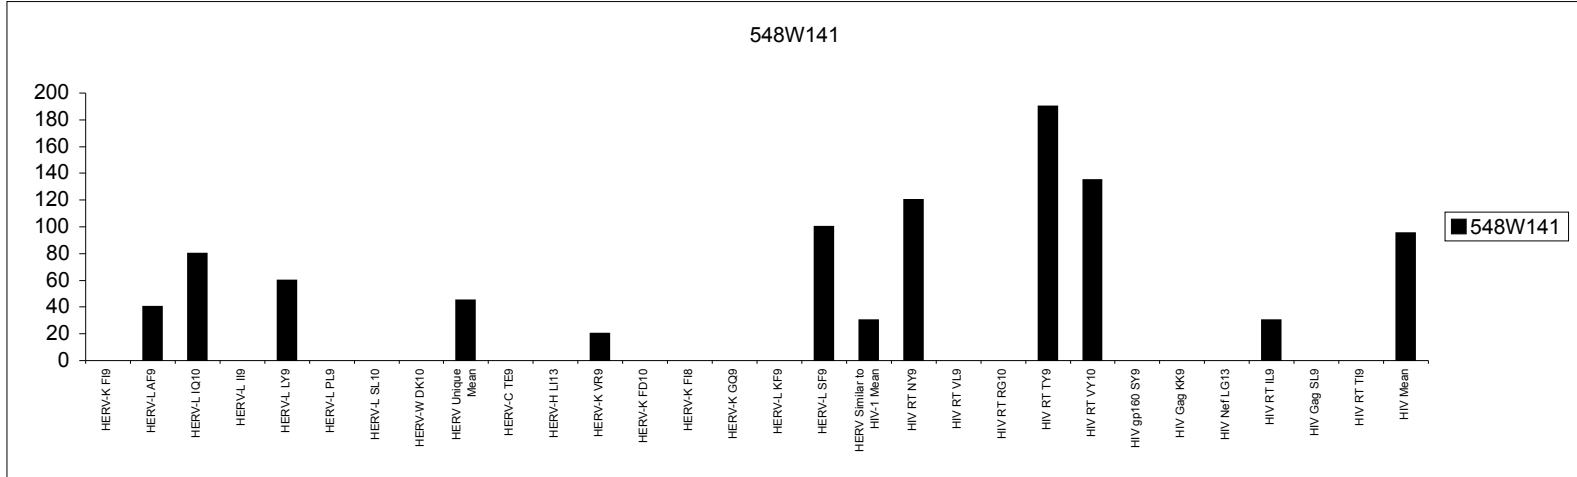

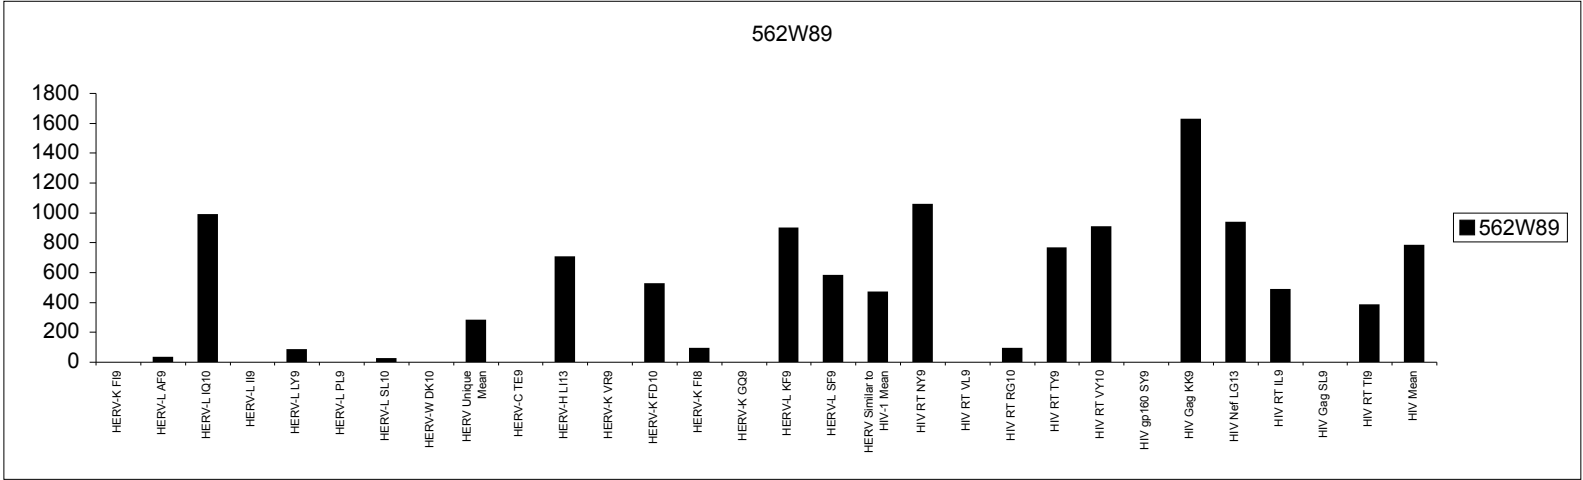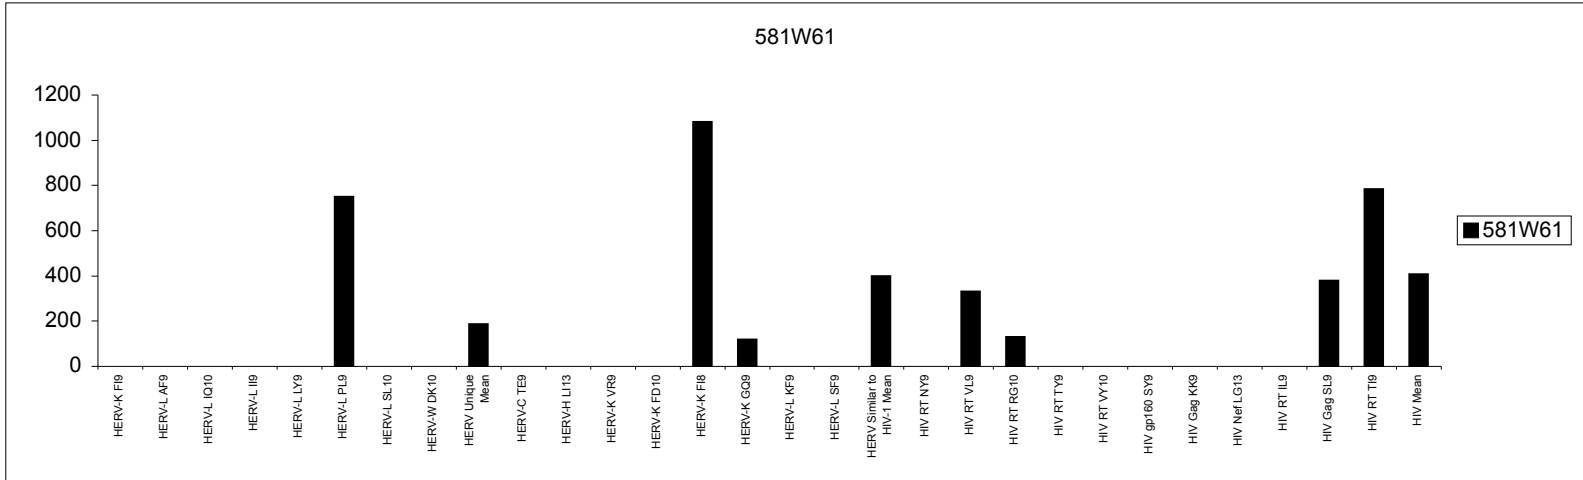

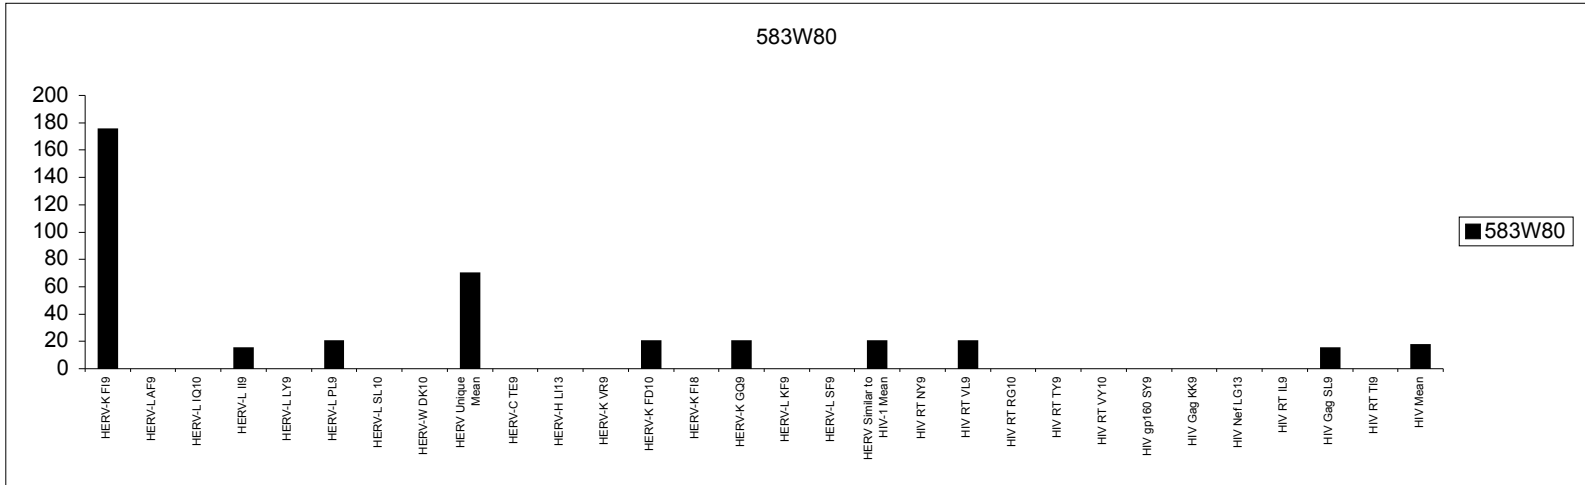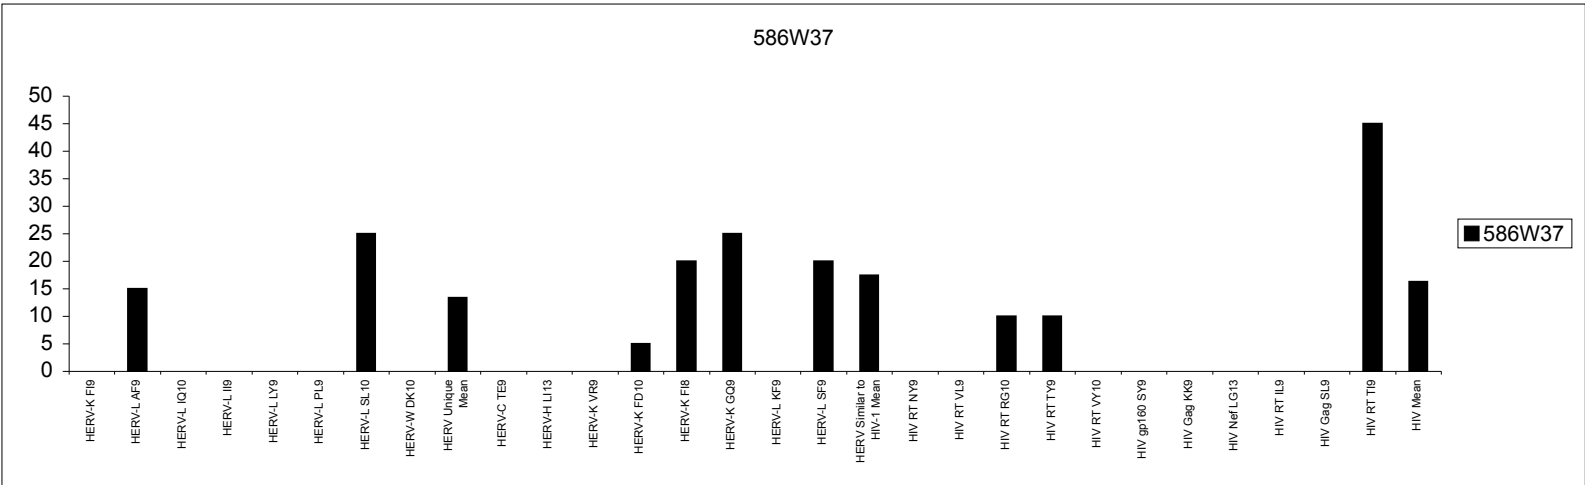

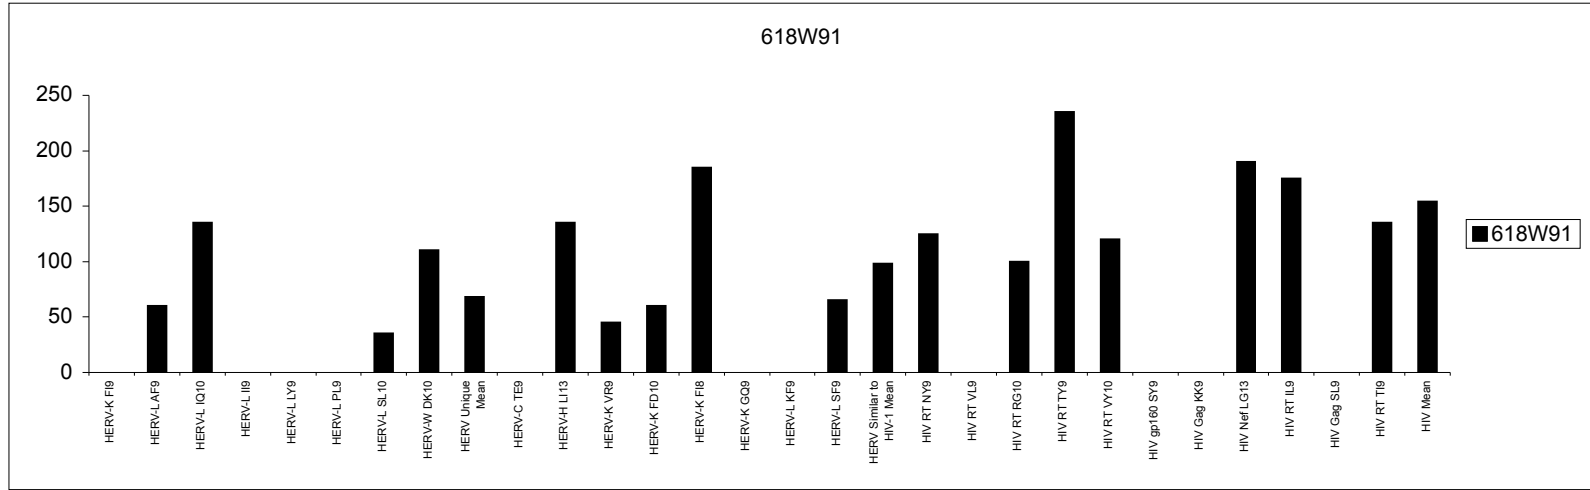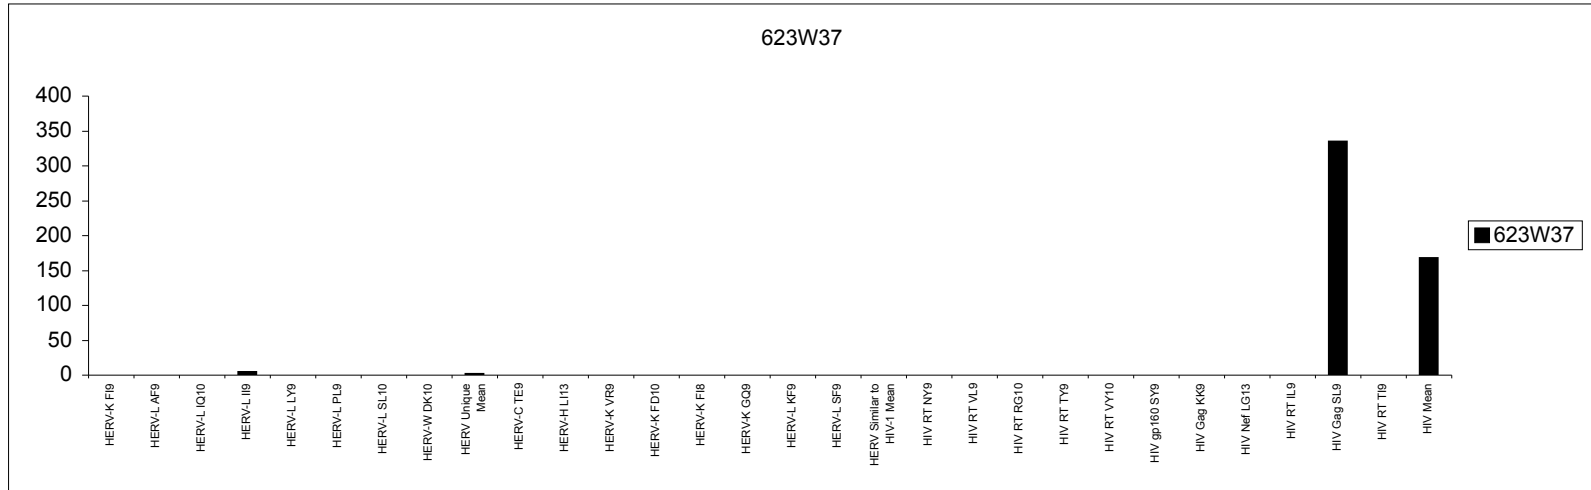

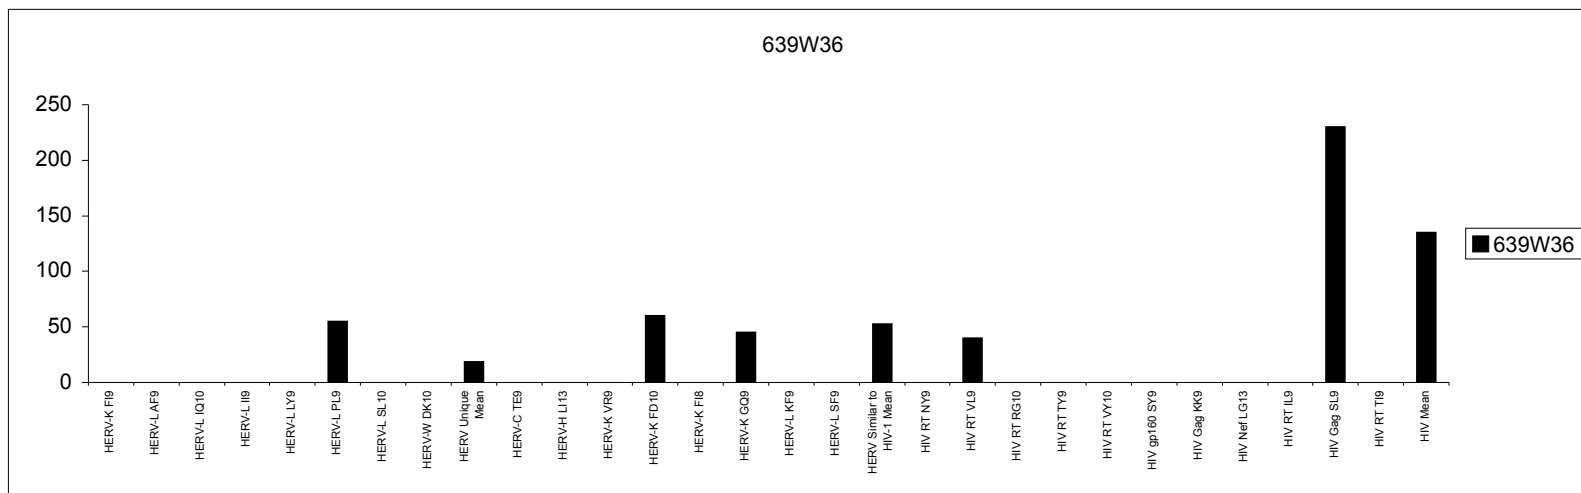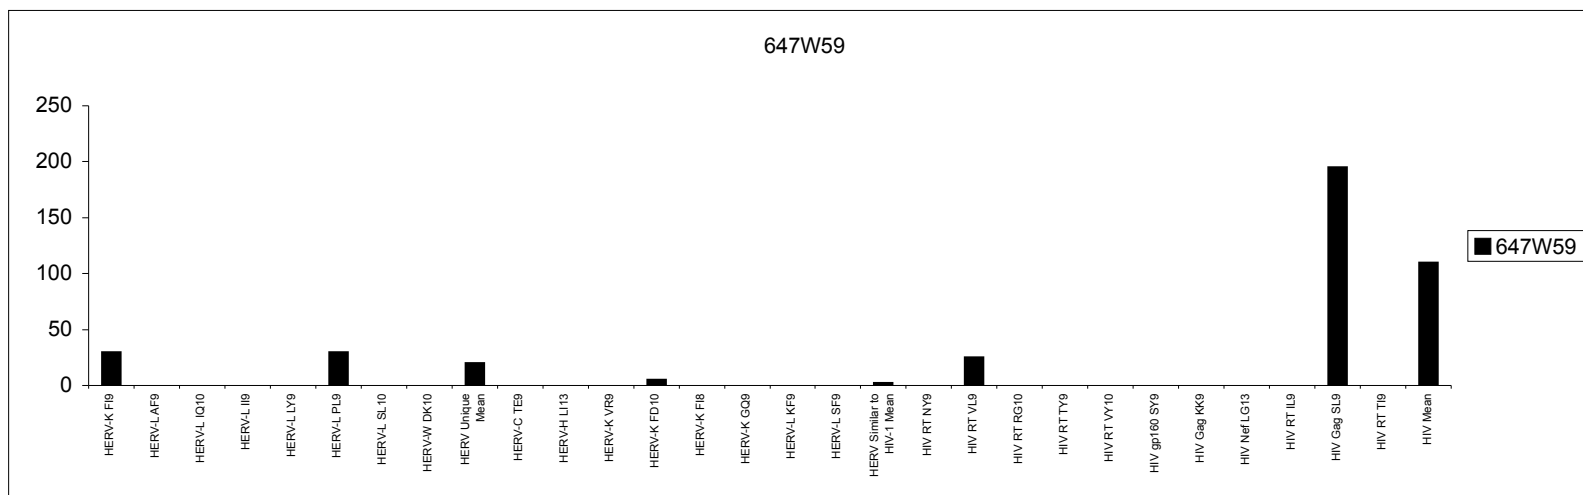



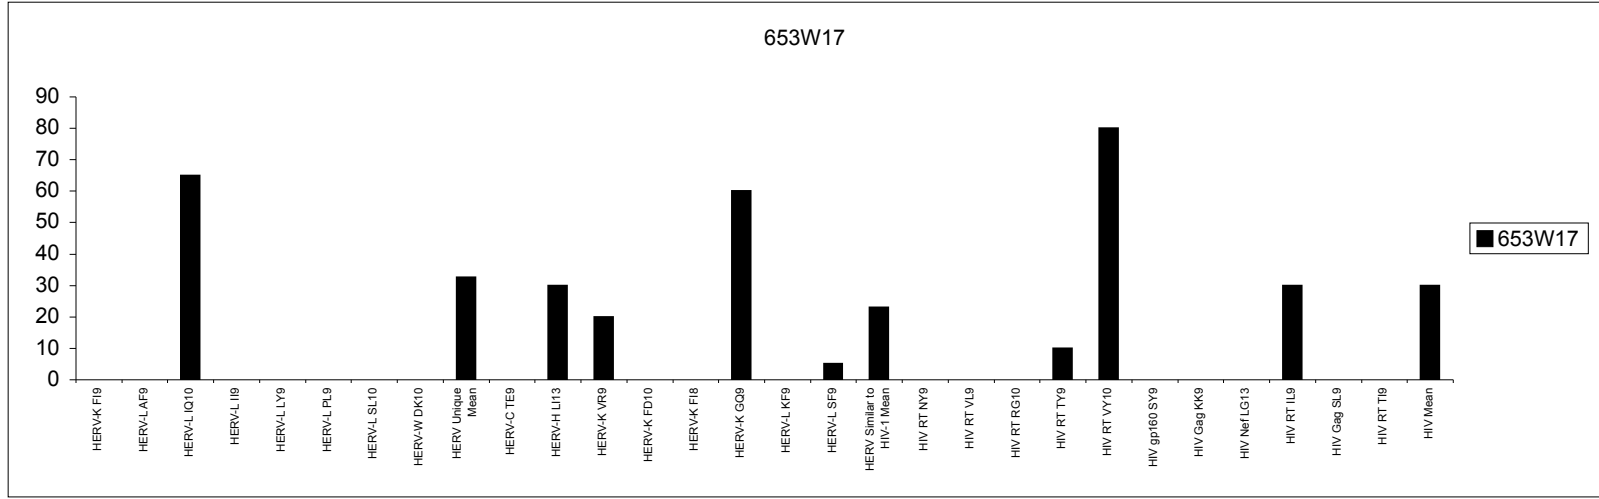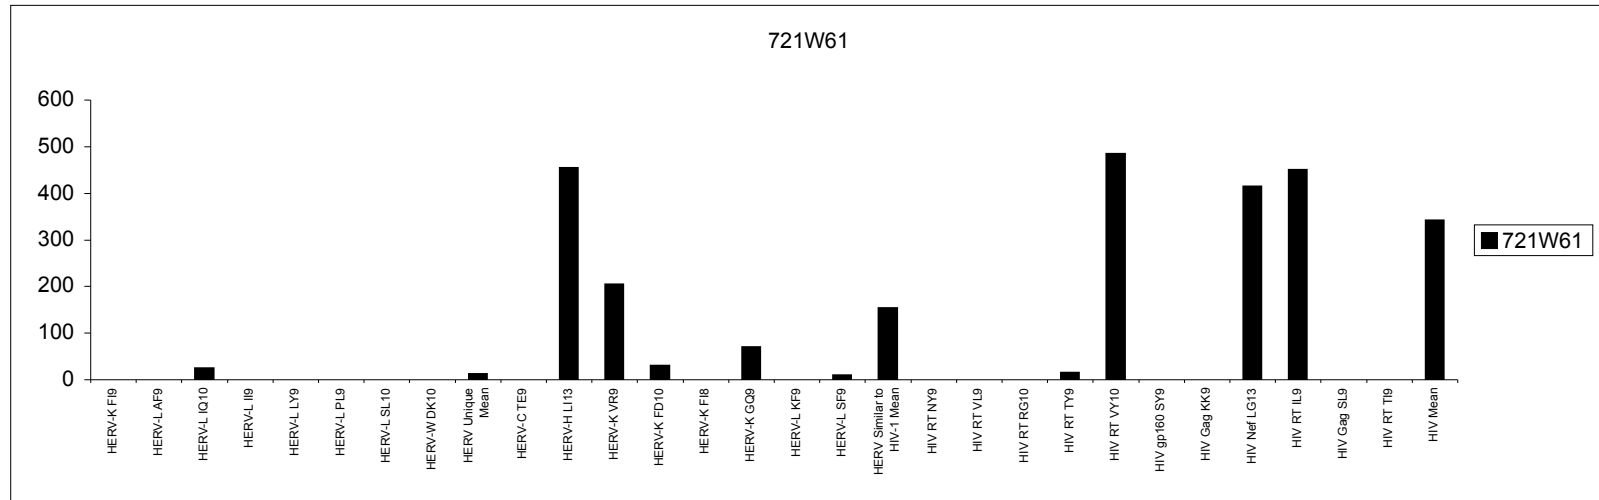

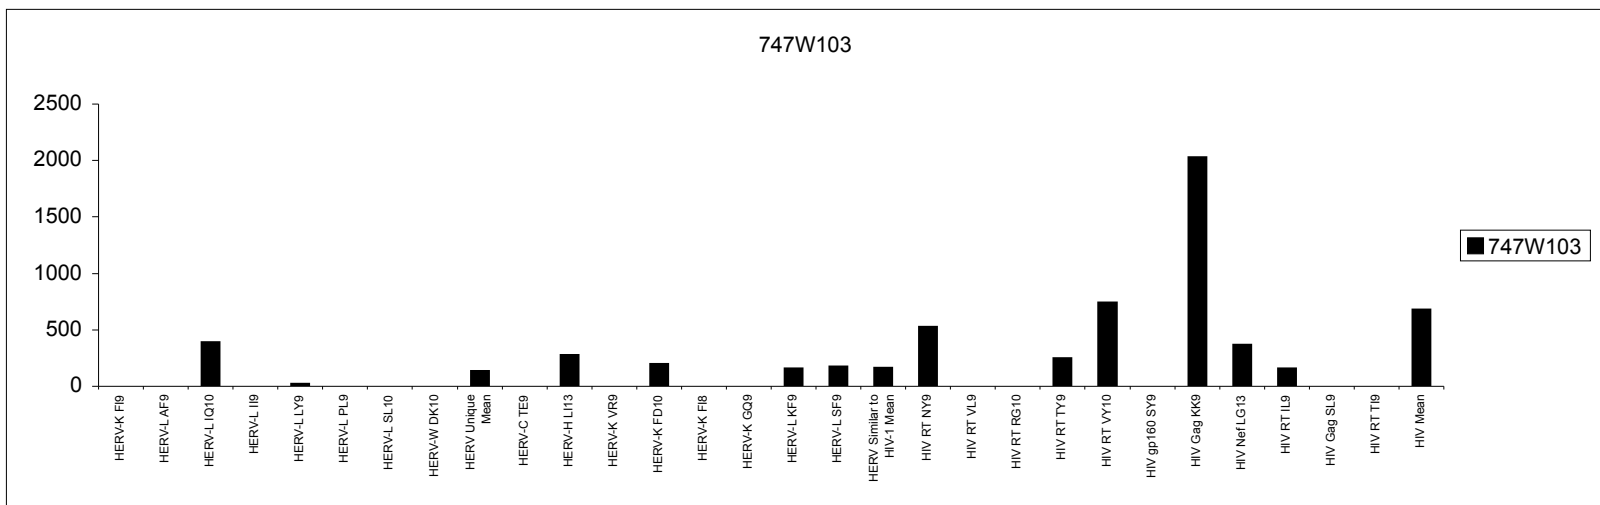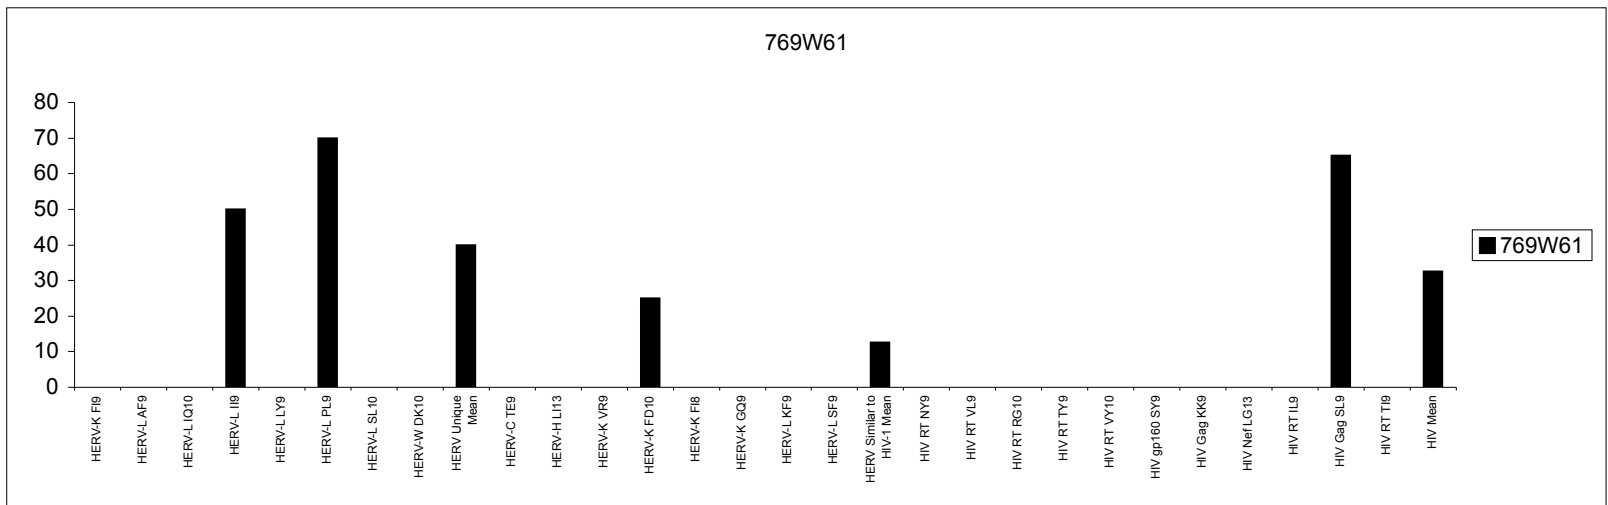

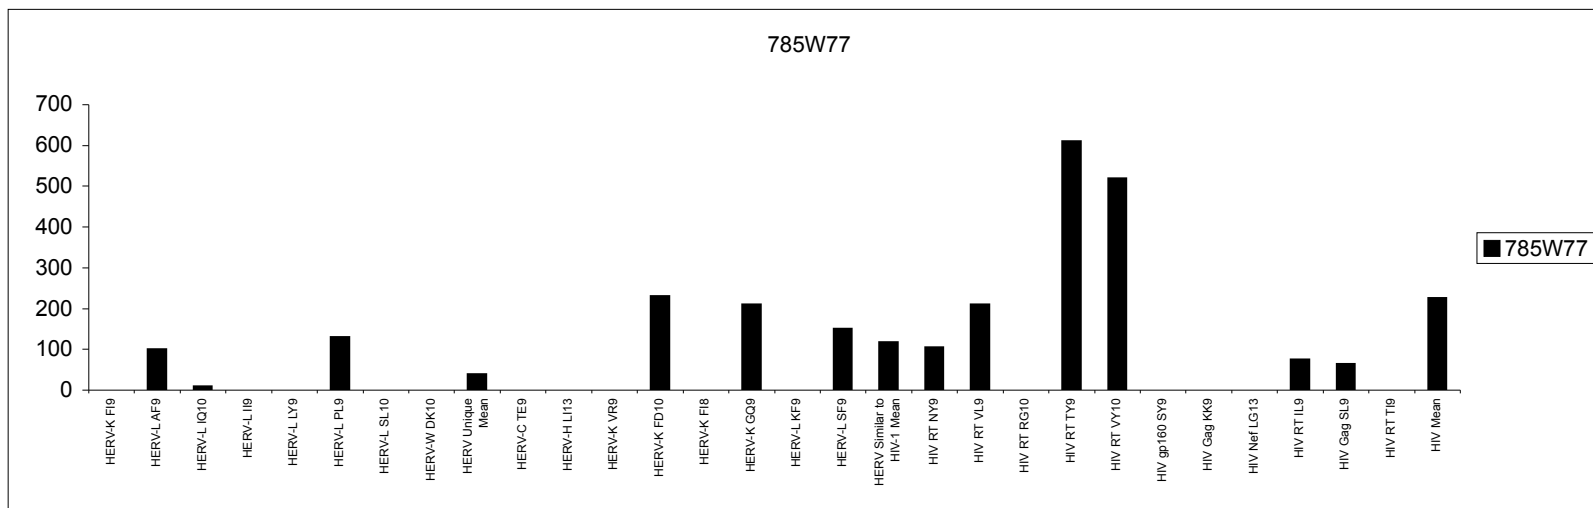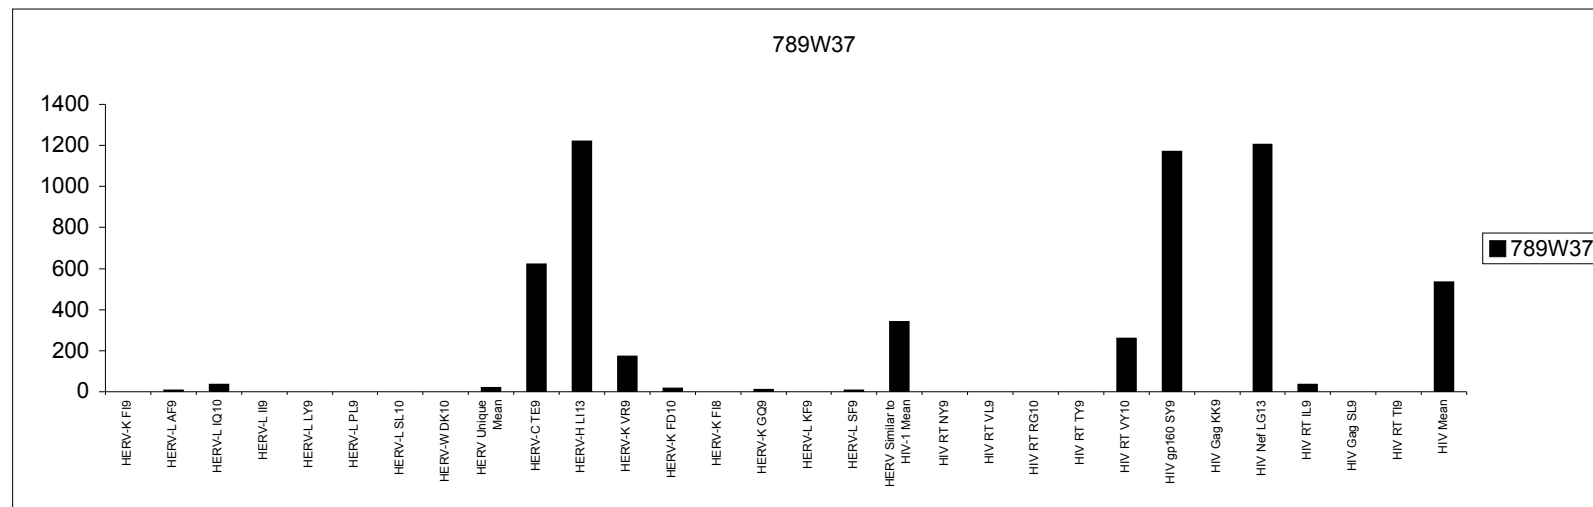

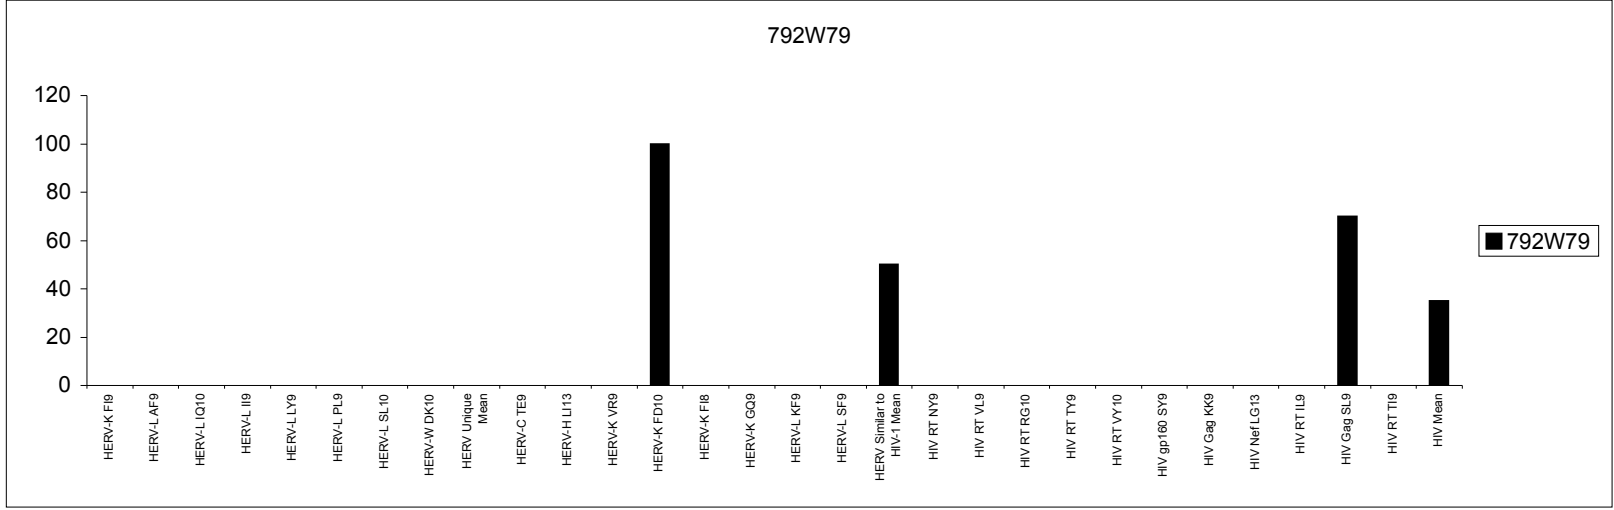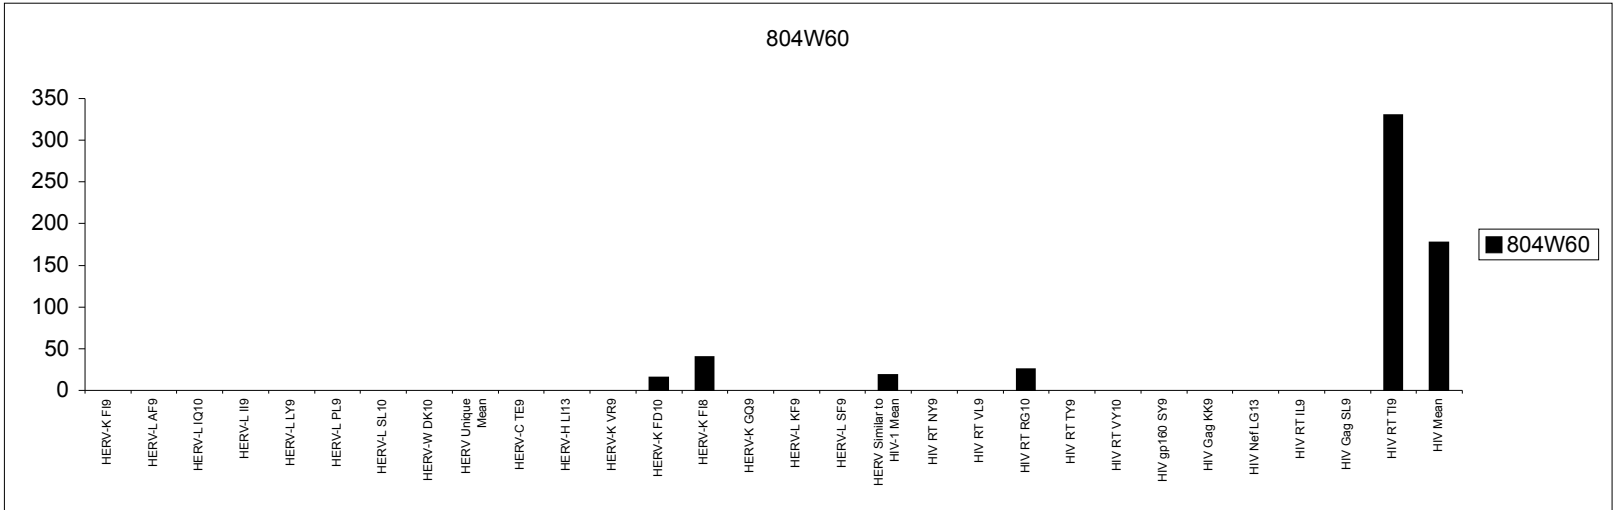

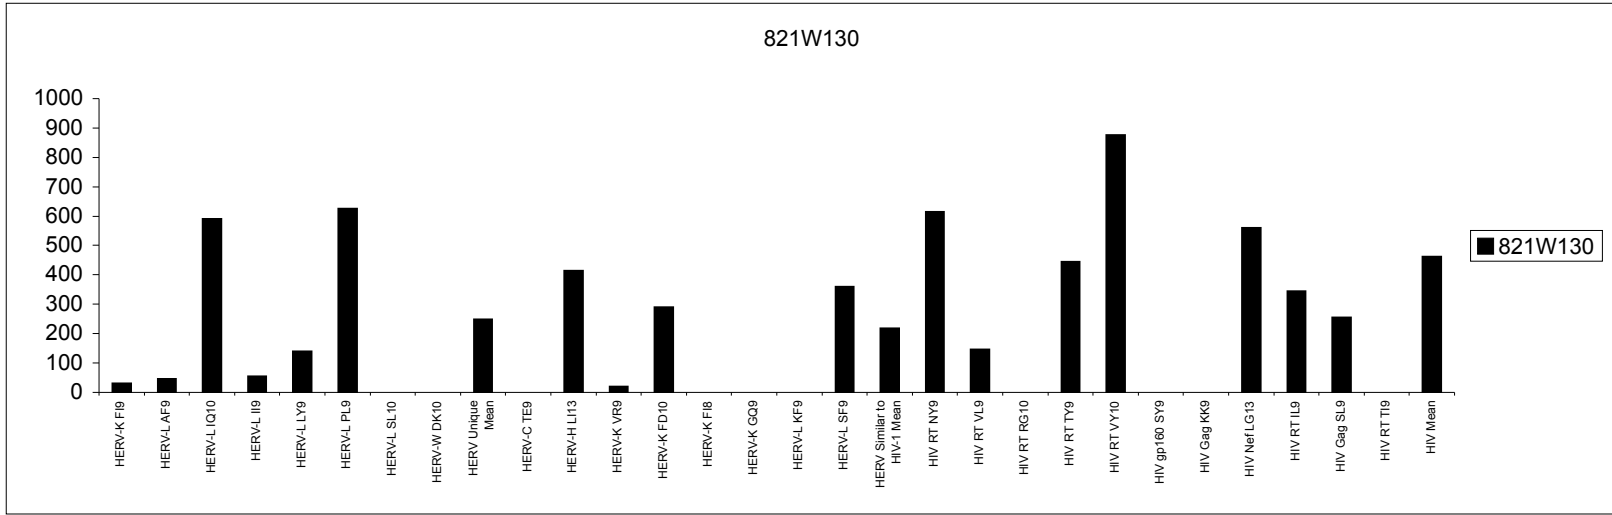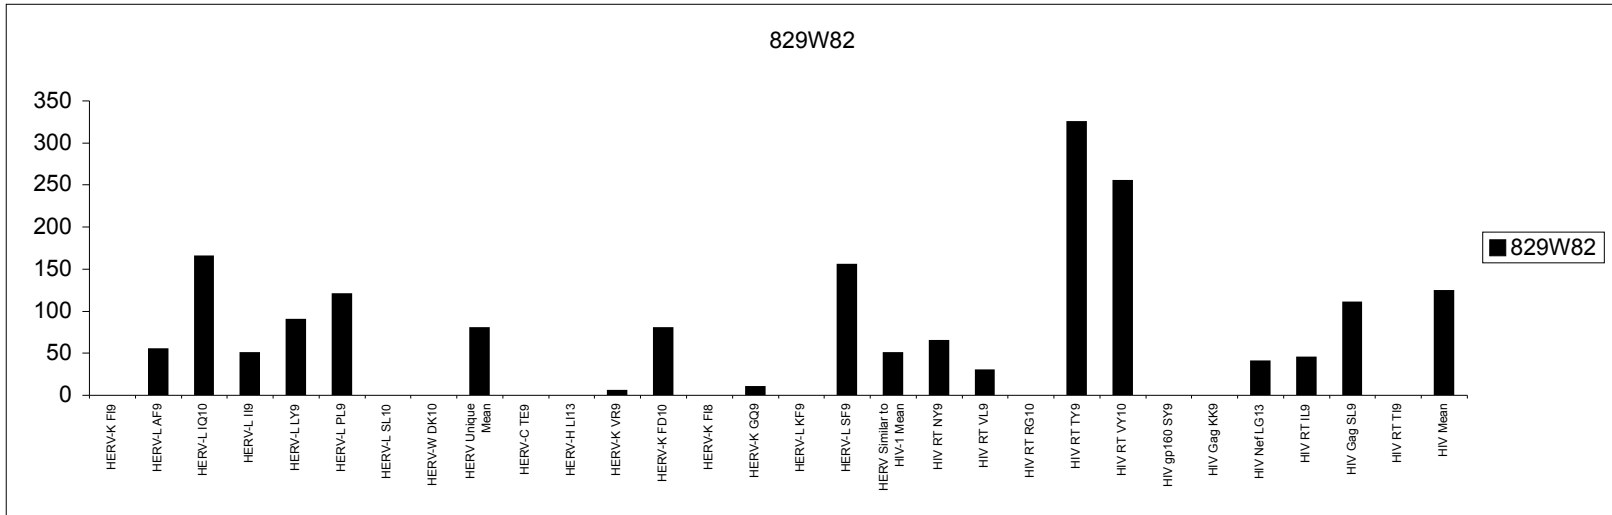

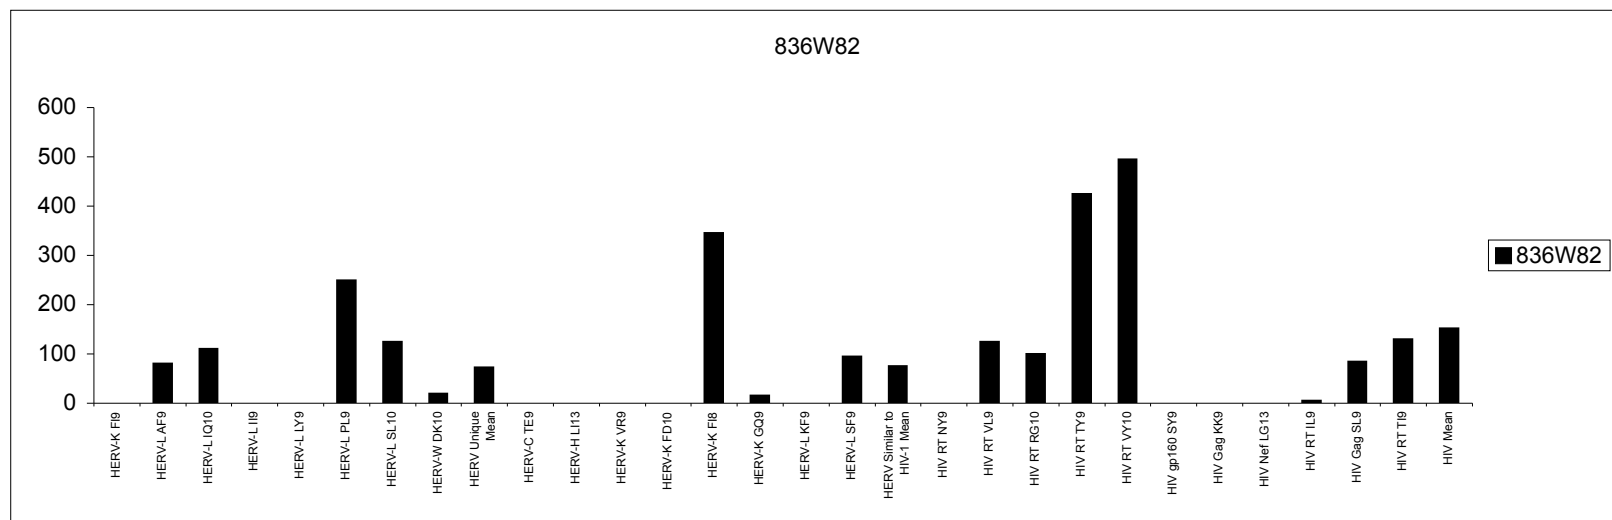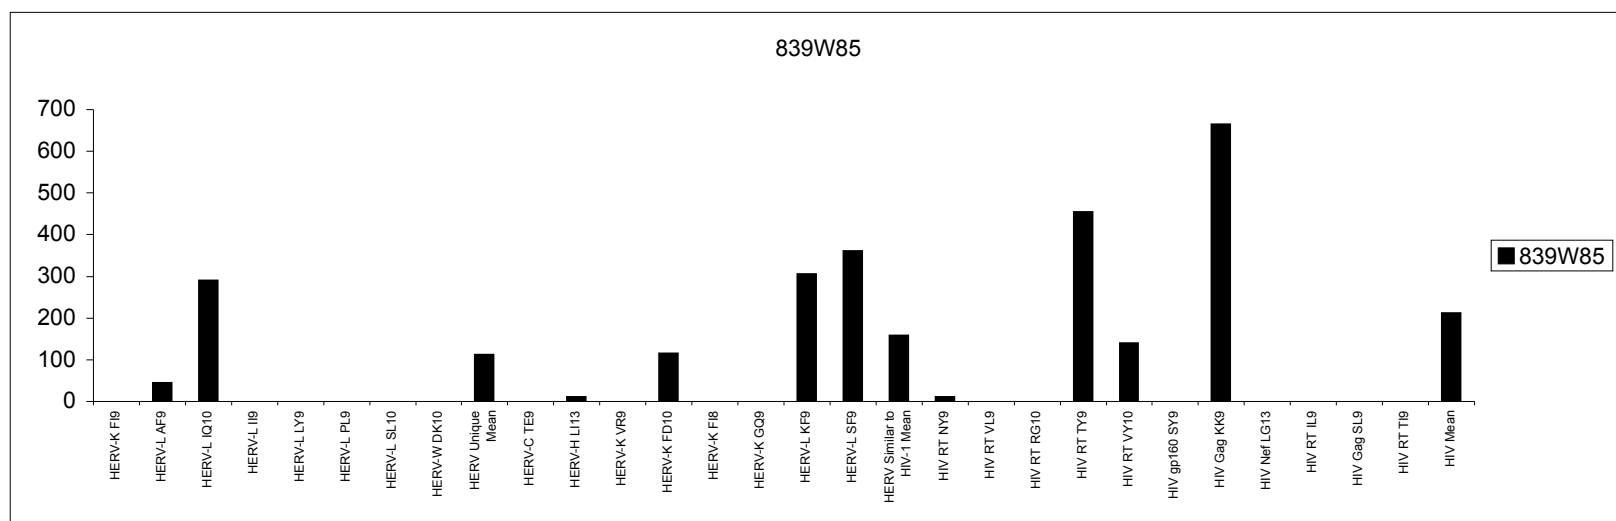

841W138

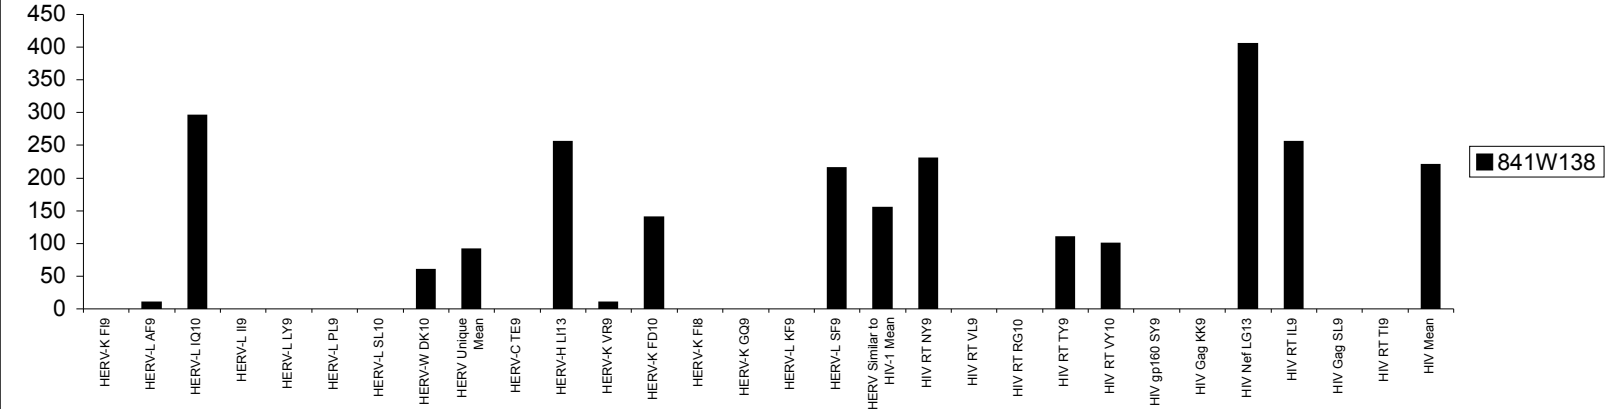

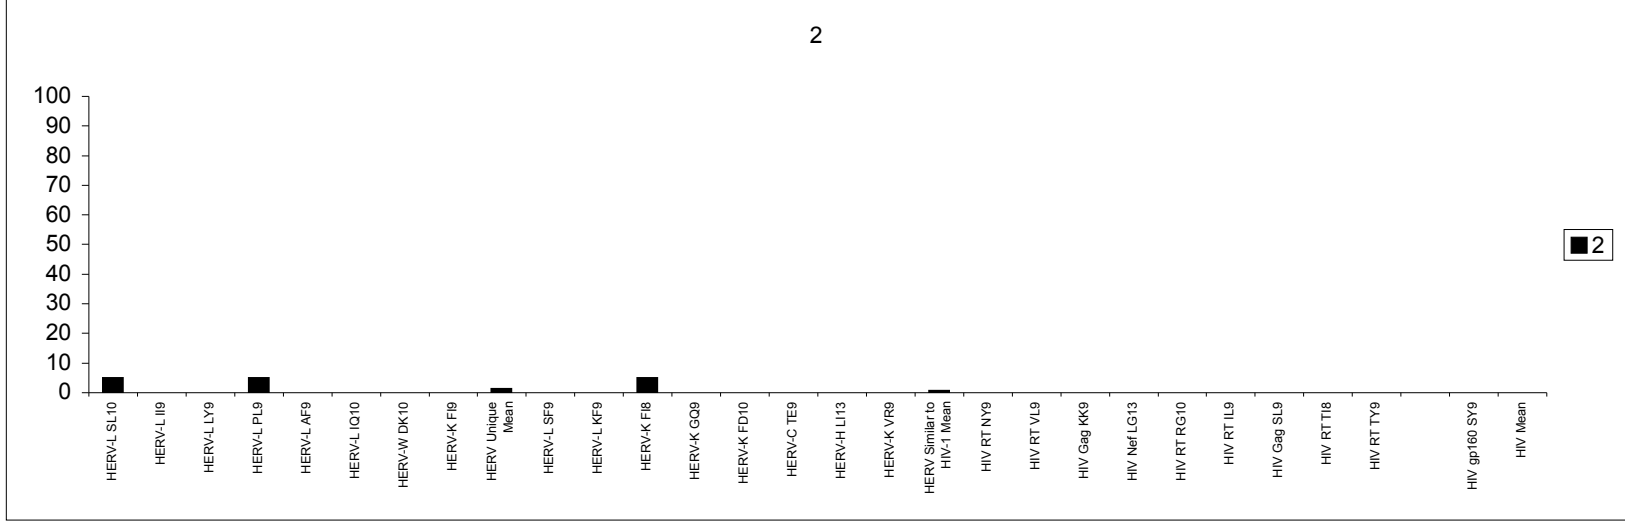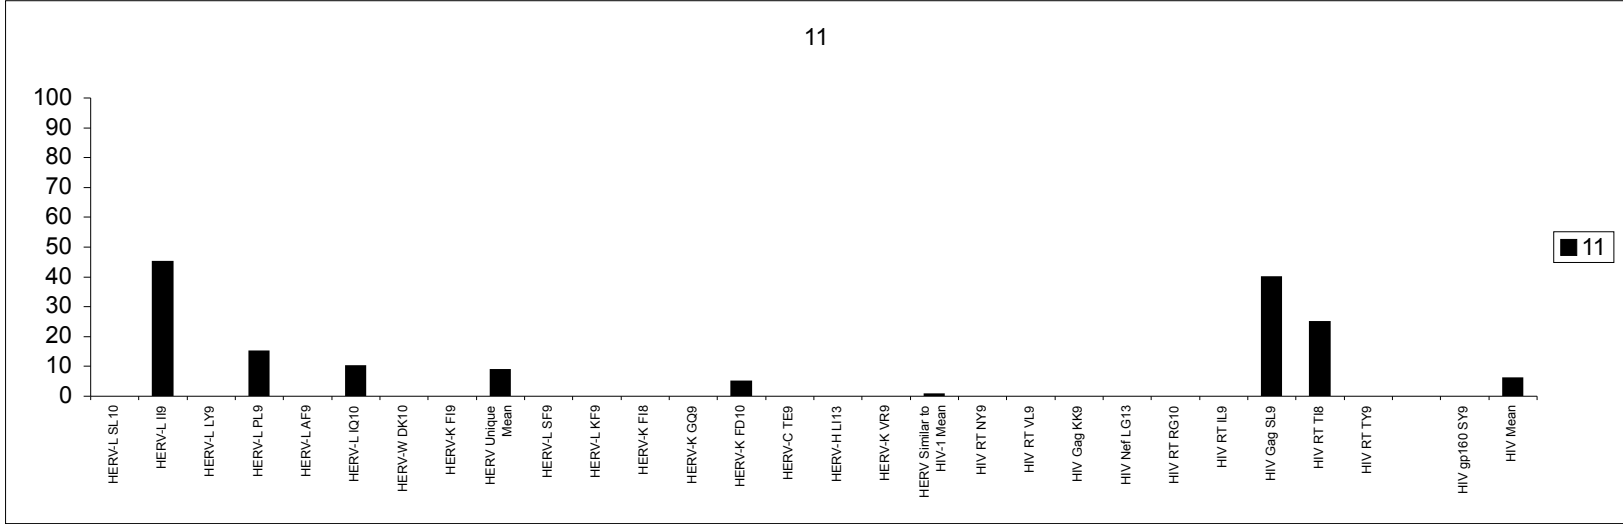



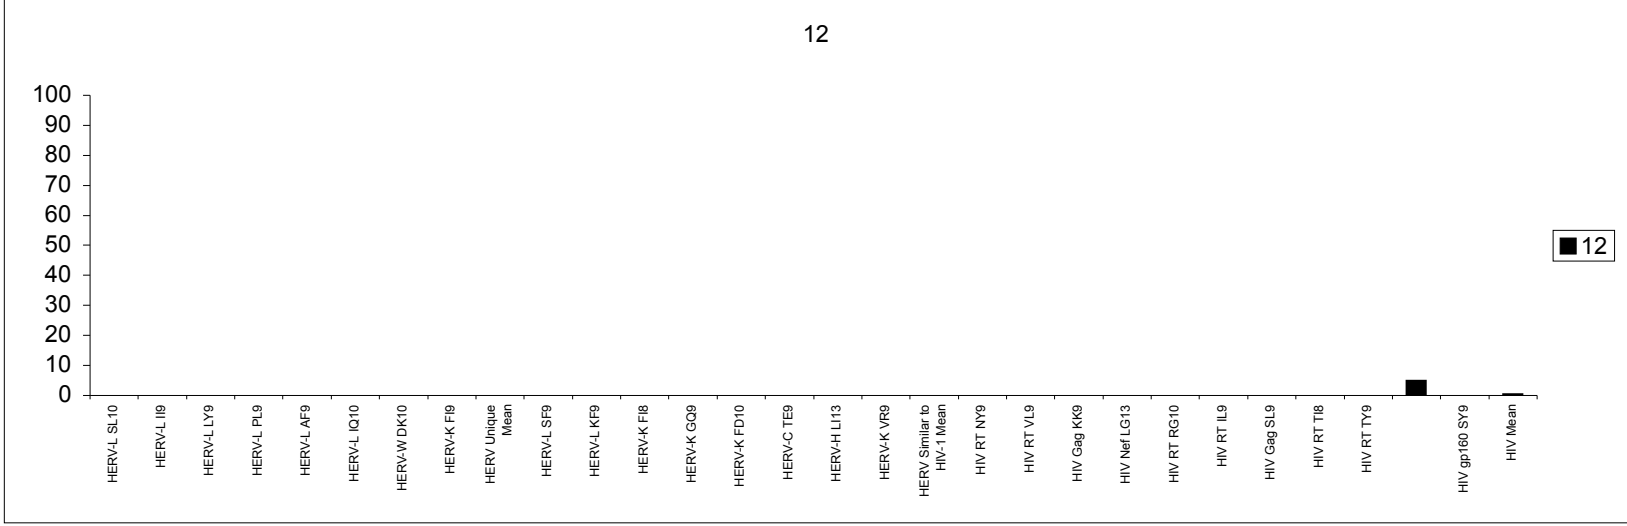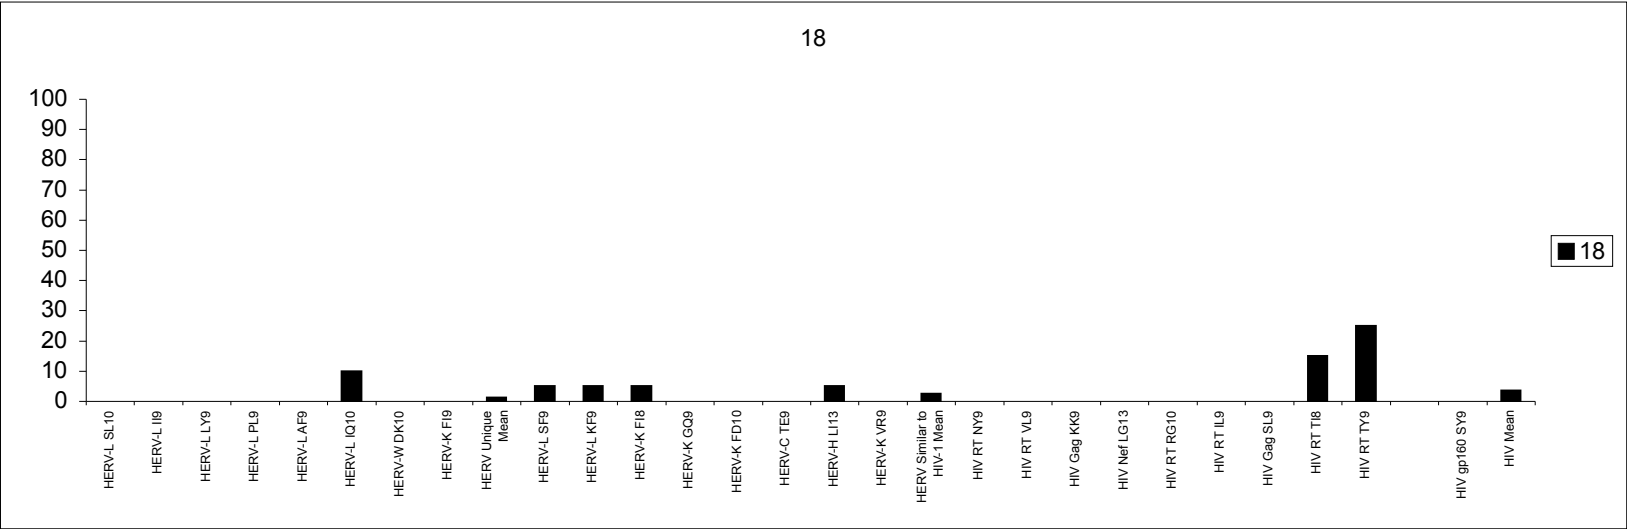

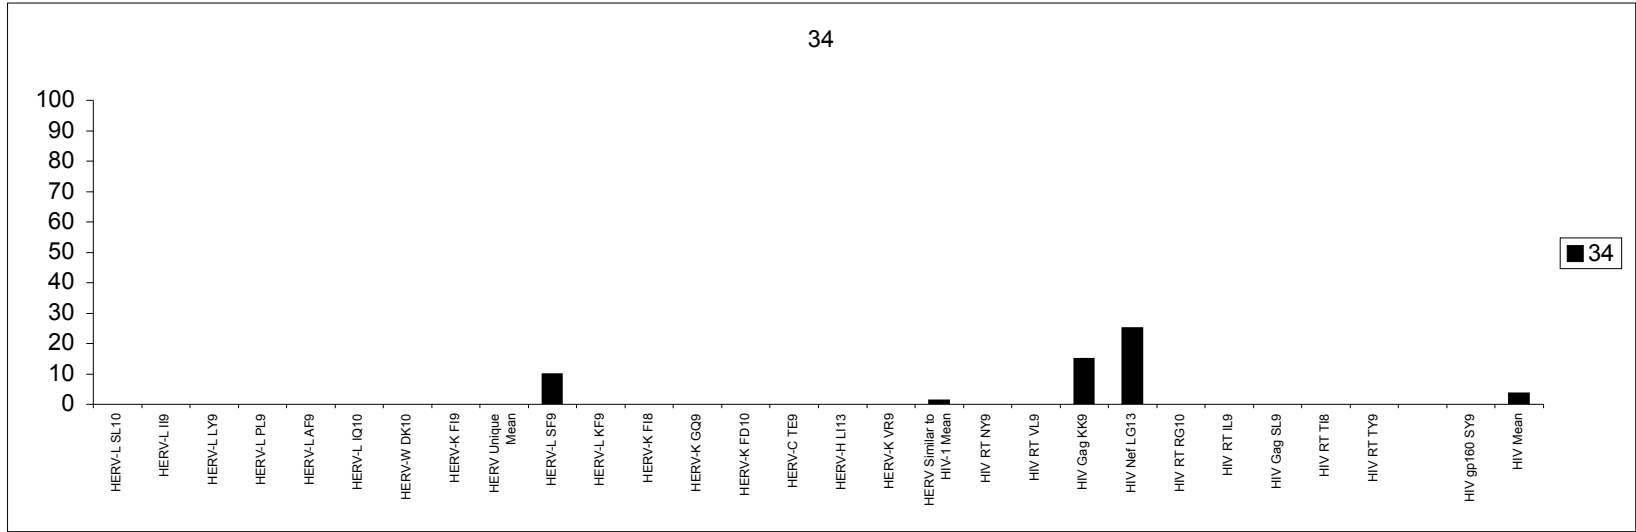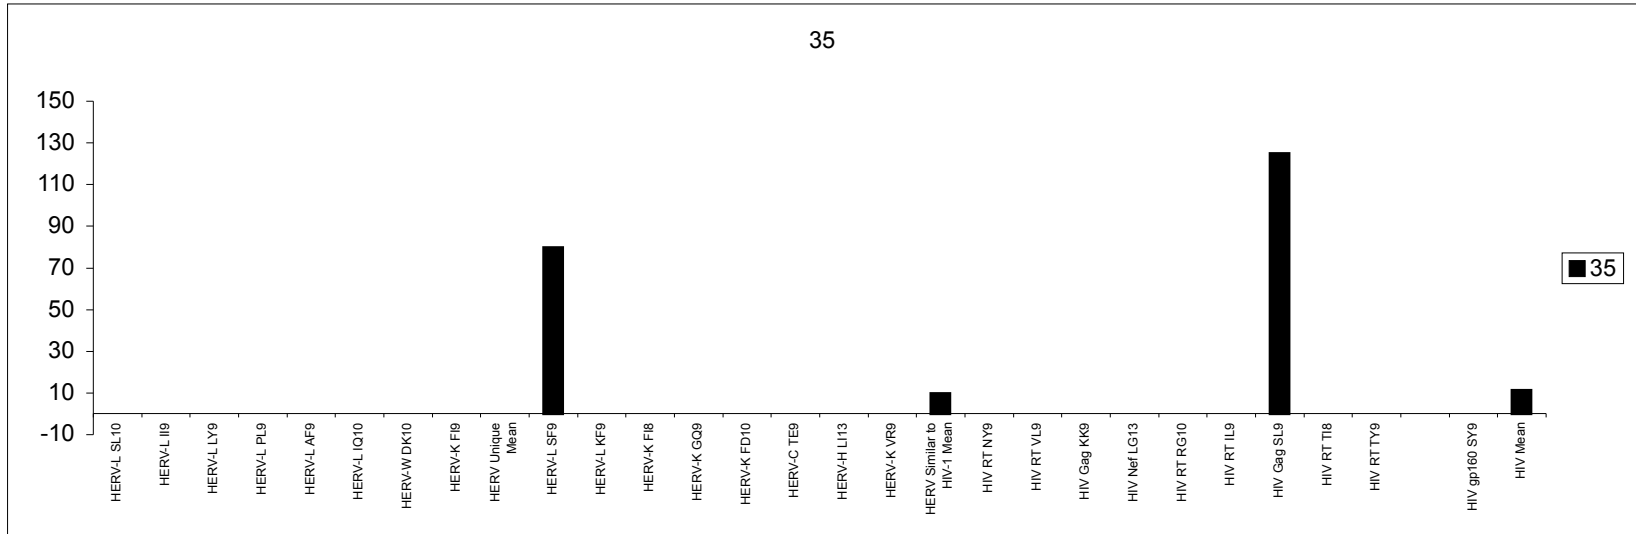

36

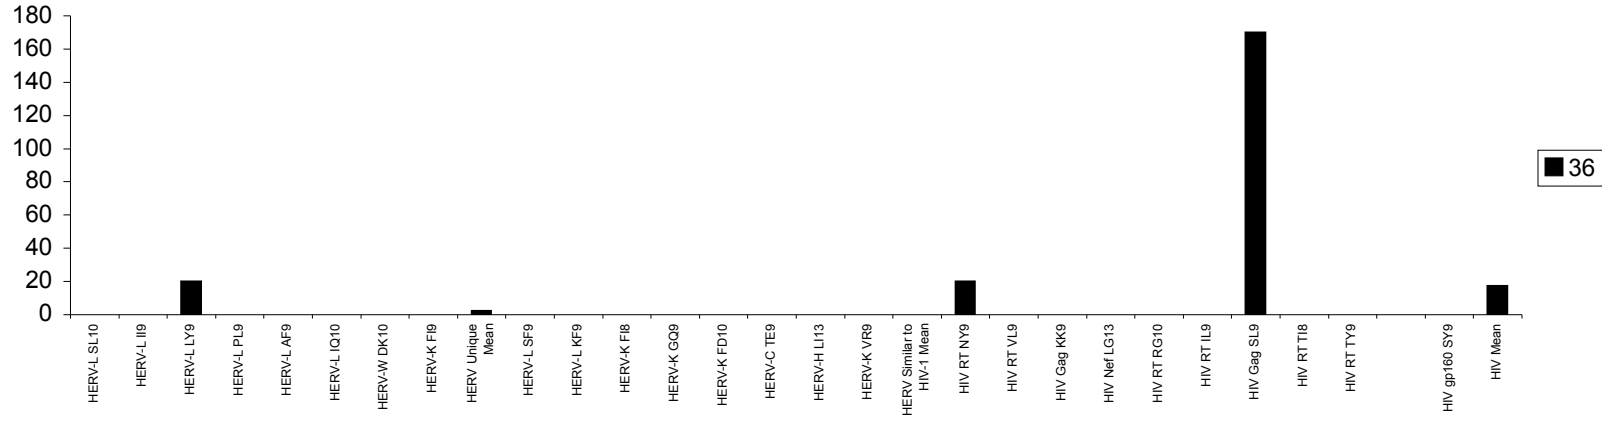

37

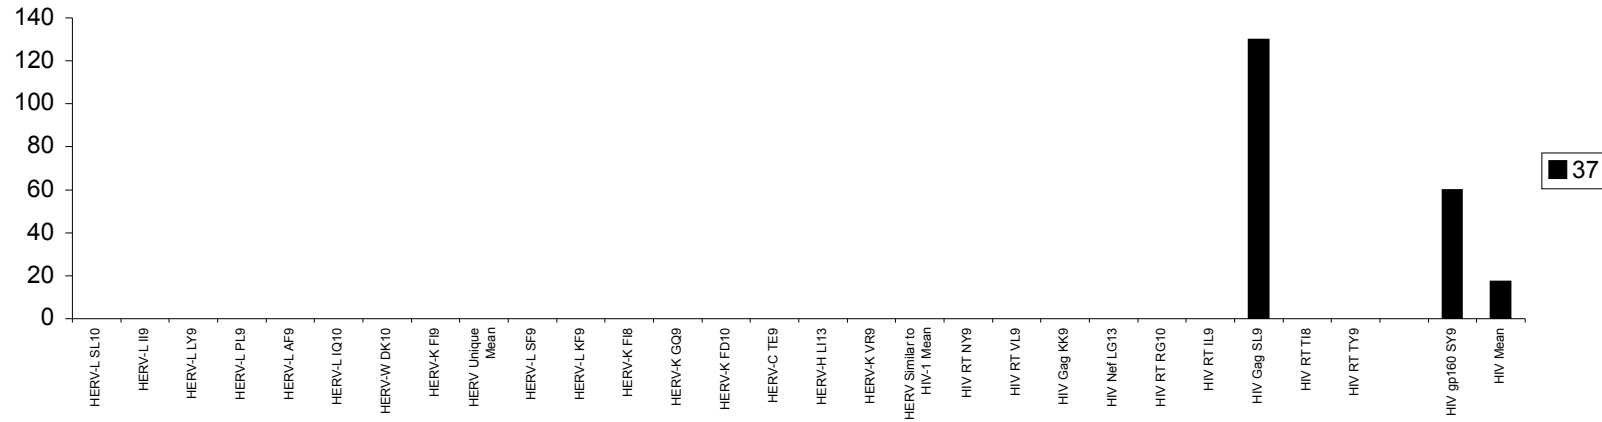

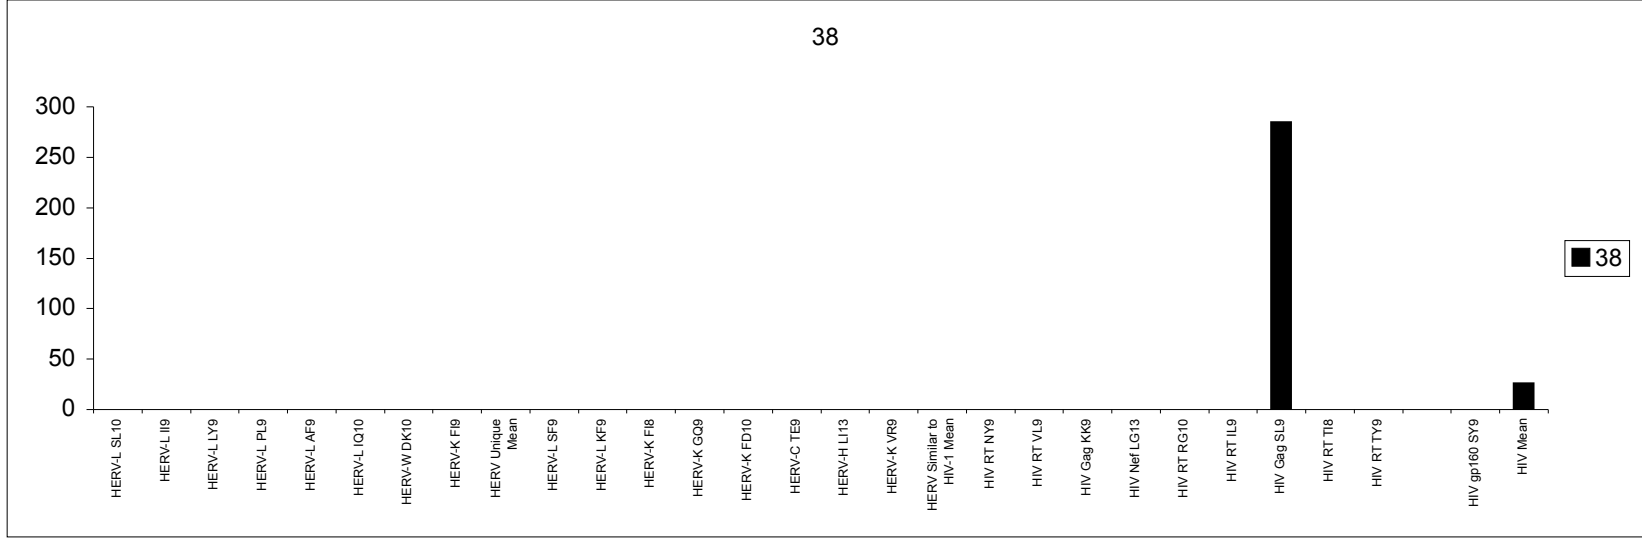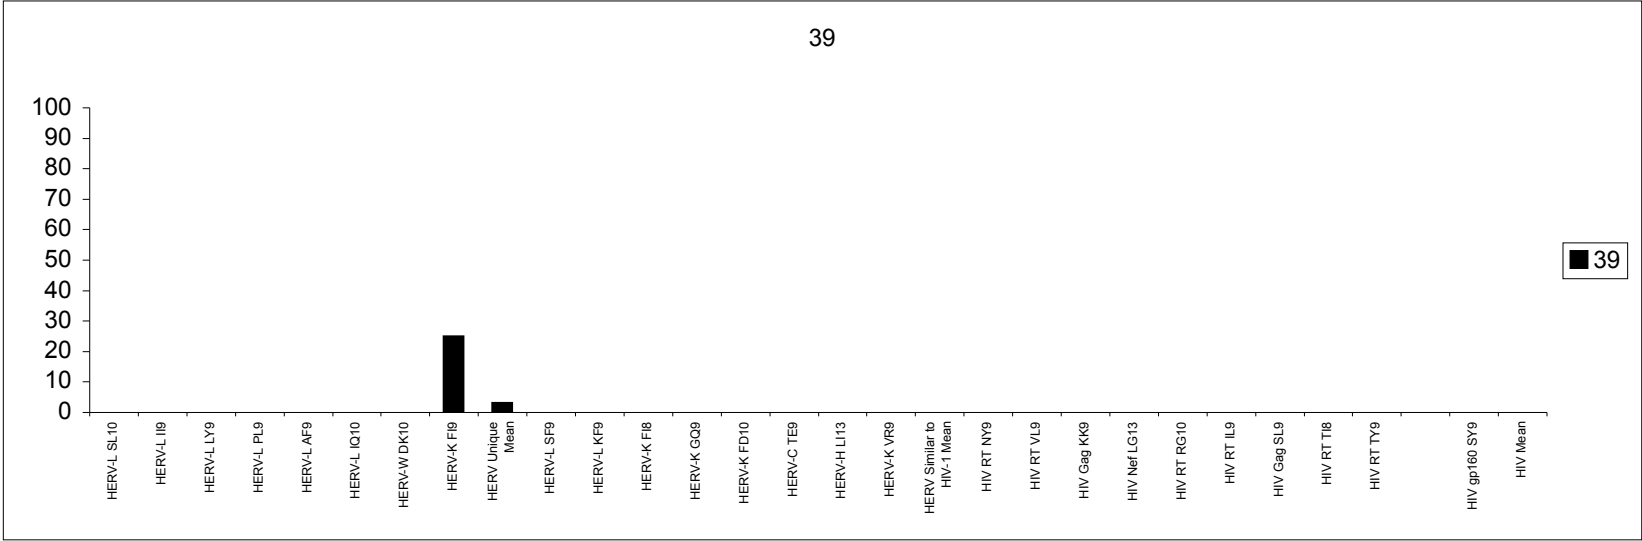

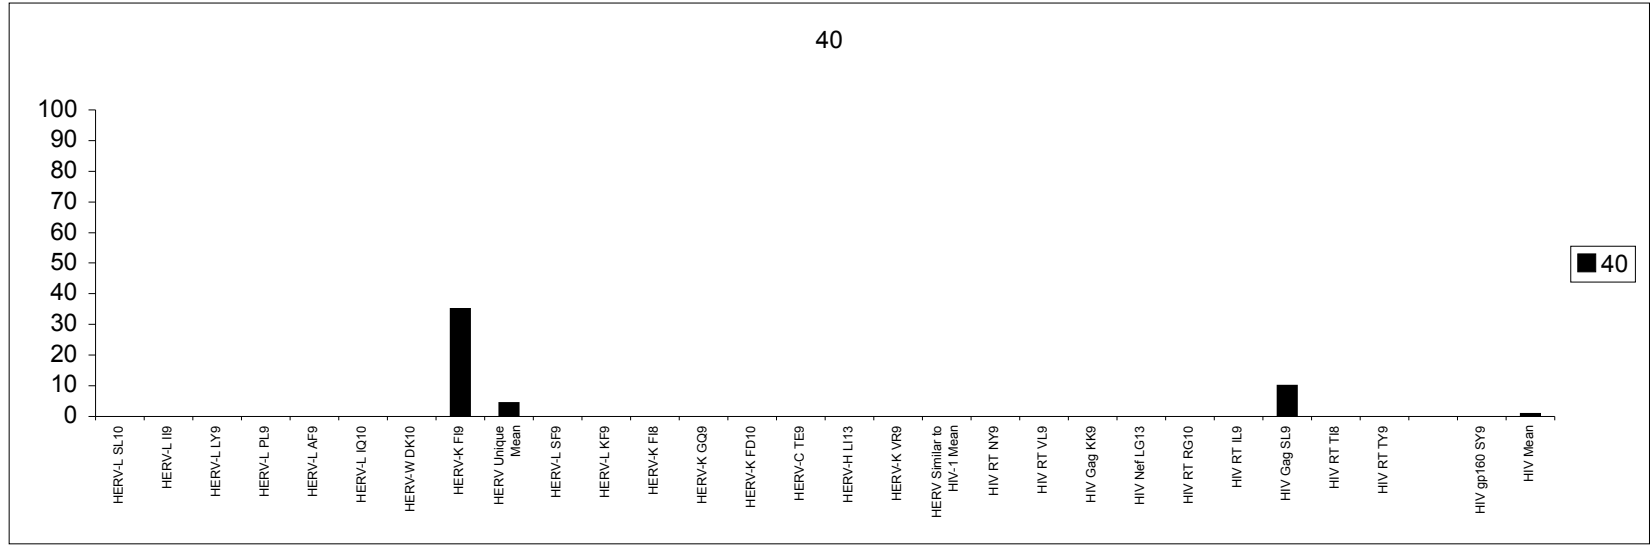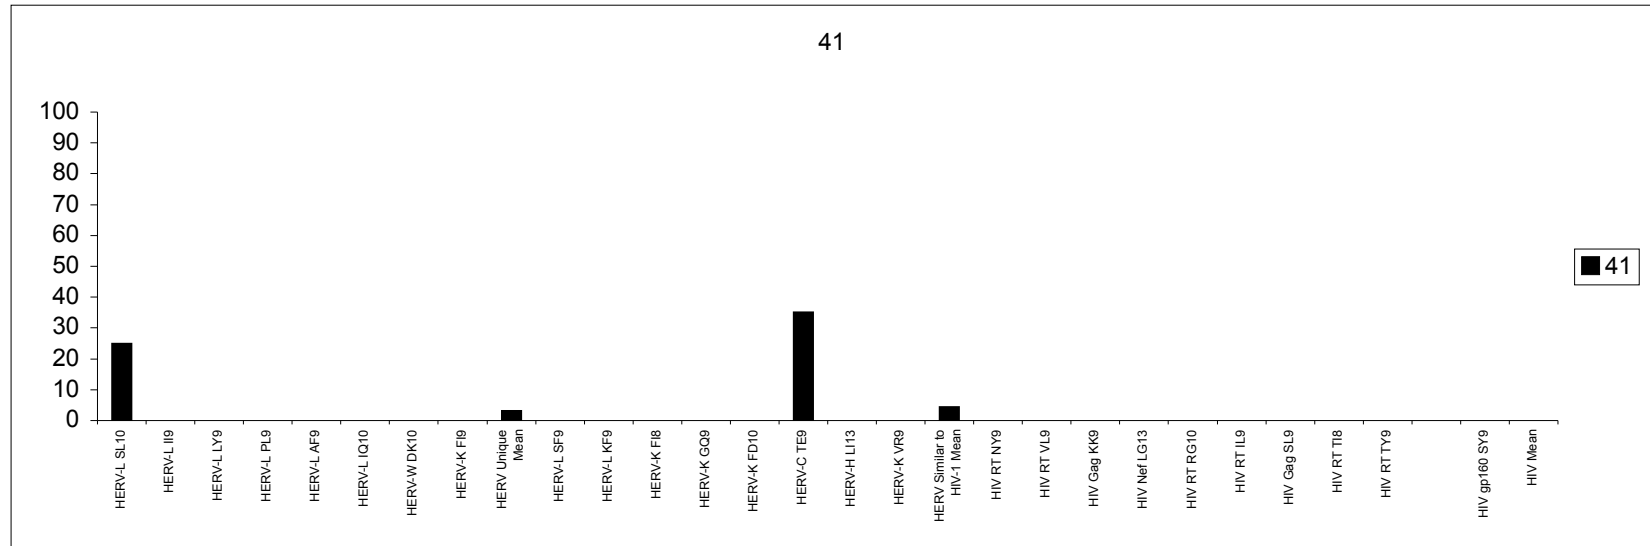

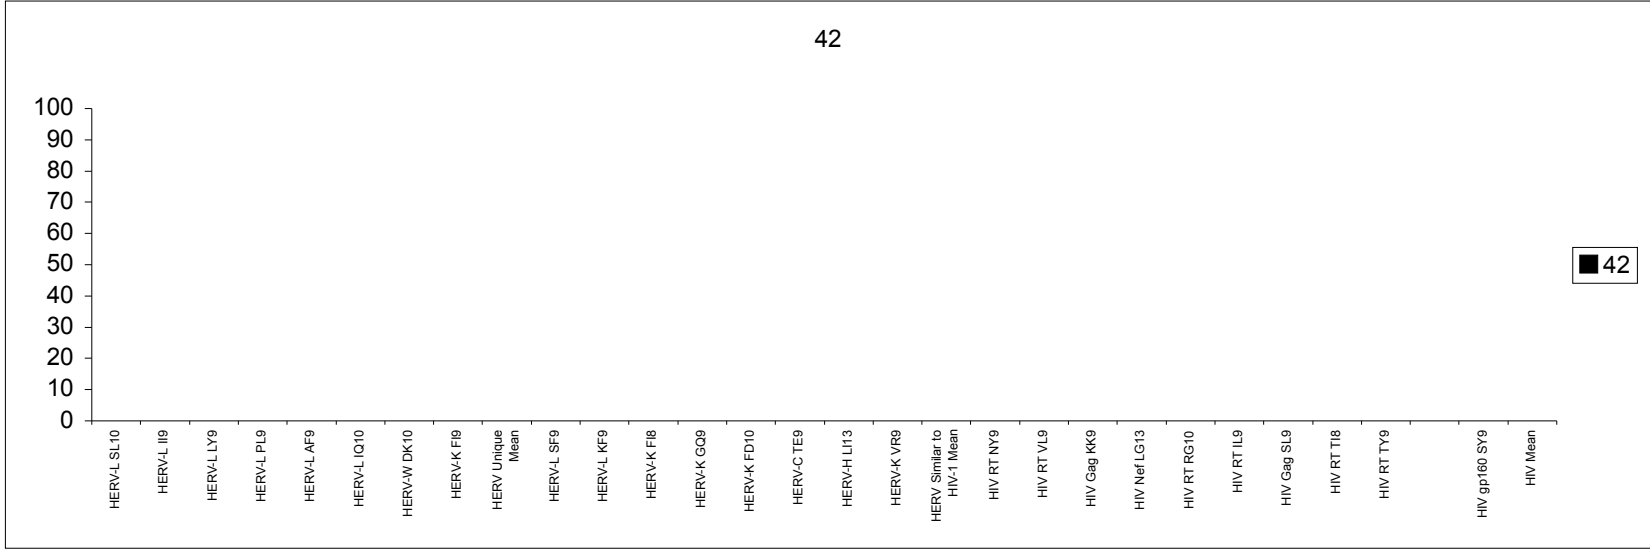

■ 42

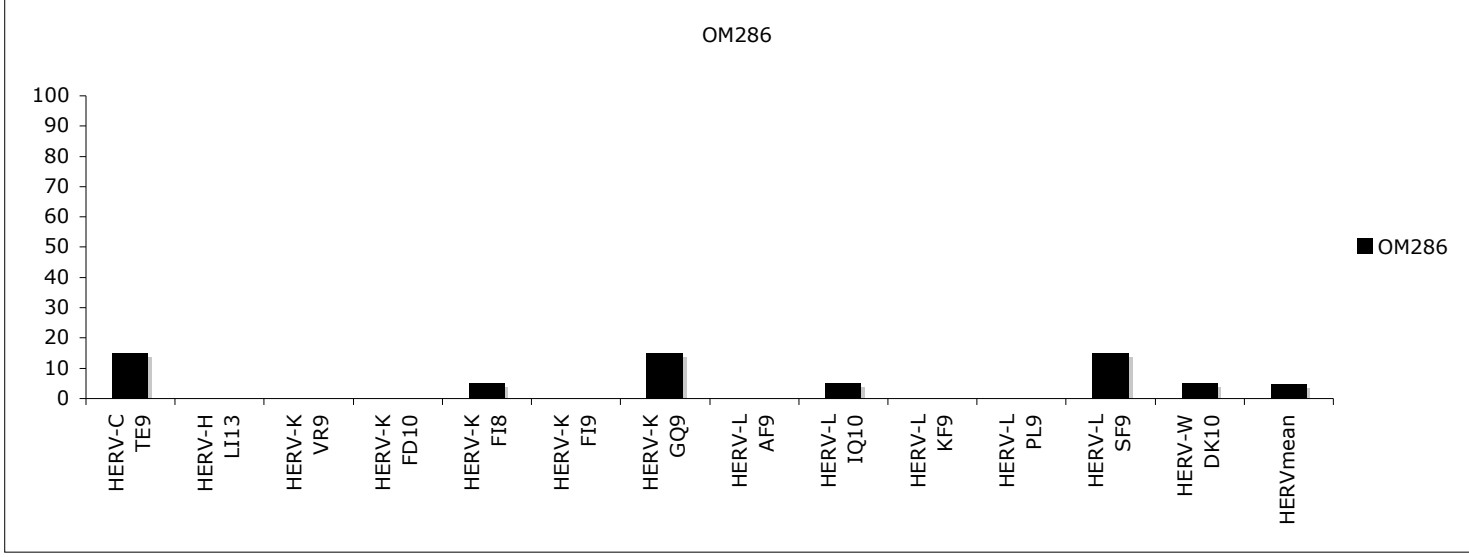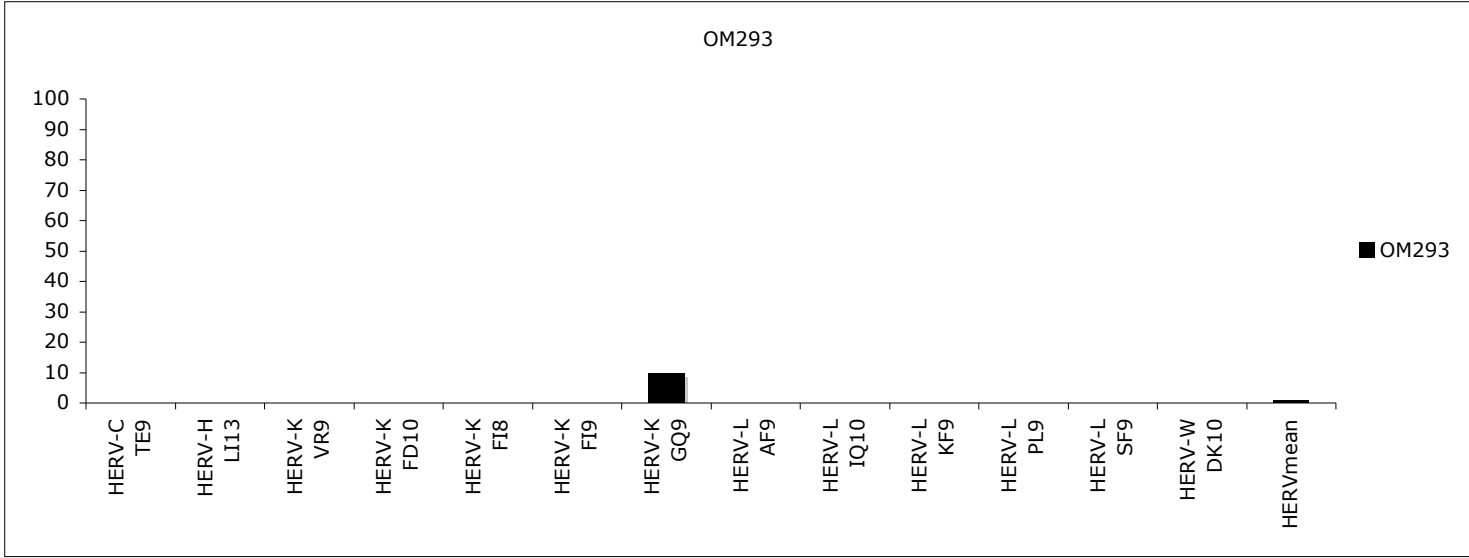

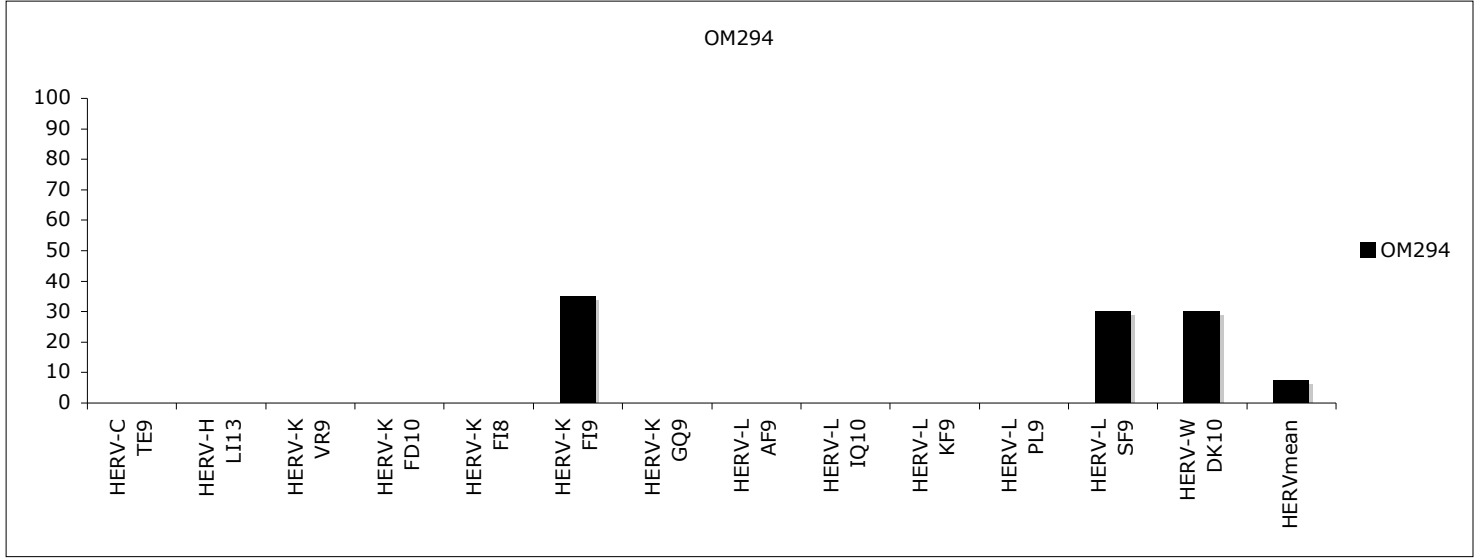

Supplement: ppat.0030165.sg003.pdf [file ppat.0030165.sg003.pdf]
